1

2 **Effects of FLOWERING LOCUS T on FD during the transition to flowering at**  
3 **the shoot apical meristem of *Arabidopsis thaliana***

4

5 Silvio Collani<sup>1,2</sup>, Manuela Neumann<sup>2</sup>, Levi Yant<sup>2,#</sup>, Markus Schmid<sup>1,2,3,\*</sup>

6

7

8 **Affiliations**

9 <sup>1</sup>Umeå Plant Science Centre, Department of Plant Physiology, Umeå University, SE-  
10 901 87 Umeå, Sweden.

11 <sup>2</sup>Max Planck Institute for Developmental Biology, Department of Molecular Biology,  
12 72076 Tübingen, Germany.

13 <sup>3</sup>Beijing Advanced Innovation Centre for Tree Breeding by Molecular Design, Beijing  
14 Forestry University, Beijing 100083, People's Republic of China.

15

16 **Current Address**

17 <sup>#</sup>School of Life Sciences, University of Nottingham, United Kingdom.

18

19

20 **Short Title:**

21 Targets of the flowering time regulator FD

22

23

24 **\*Corresponding author email:**

25 markus.schmid@umu.se

26

27 **Material Distribution**

28 The author responsible for distribution of materials integral to the findings presented in  
29 this article in accordance with the policy described in the Instructions for Authors  
30 ([www.cell.com/molecular-plant/authors](http://www.cell.com/molecular-plant/authors)): Markus Schmid ([markus.schmid@umu.se](mailto:markus.schmid@umu.se)).

31

32

33 **Contact Information:**

34 Umeå Plant Science Centre (UPSC), Dept. of Plant Physiology

35 Umeå University, SE-901 87 Umeå, SWEDEN

36 **ABSTRACT**

37 The transition to flowering is a crucial step in the plant life cycle that is controlled by  
38 multiple endogenous and environmental cues, including hormones, sugars,  
39 temperature, and photoperiod. Permissive photoperiod induces *FLOWERING LOCUS*  
40 *T (FT)* in the phloem companion cells of leaves. The FT protein then acts as a florigen  
41 that is transported to the shoot apical meristem (SAM) where it physically interacts  
42 with the bZIP transcription factor FD and 14-3-3 proteins. However, despite the  
43 importance of FD for promoting flowering, its direct transcriptional targets are largely  
44 unknown. Here we combined ChIP-seq and RNA-seq to identify targets of FD at the  
45 genome-wide scale and assess the contribution of FT to binding DNA. We further  
46 investigated the ability of FD to form protein complexes with FT and TFL1 through the  
47 interaction with 14-3-3 proteins. Importantly, we observe direct binding of FD to targets  
48 involved in several aspects of the plant development not directly related to the  
49 regulation of flowering time. Our results confirm FD as central regulator of the floral  
50 transition at the shoot meristem and provides evidence for crosstalk between the  
51 regulation of flowering and other signaling pathways.

52

## 53 INTRODUCTION

54 The floral transition represents a crucial checkpoint in the plant life cycle at which the  
55 shoot apical meristem (SAM) stops producing only leaves and begins producing  
56 reproductive organs. As the commitment to this developmental phase transition is  
57 usually irreversible for a given meristem, plants have evolved several pathways to  
58 integrate environmental and endogenous stimuli to ensure flowering is induced at the  
59 correct time. A rich literature has identified hormones, sugars, temperature, and day  
60 length (photoperiod) as main factors in flowering time regulation (reviewed in Romera-  
61 Branchat et al., 2014; Song et al., 2015; Srikanth and Schmid, 2011). Photoperiod in  
62 particular has been shown to regulate flowering time in many plant species and,  
63 depending on the light requirements, short day (SD), long day (LD) and day-neutral  
64 plants have been distinguished. In *Arabidopsis thaliana*, LD promotes flowering but  
65 plants will eventually flower even under non-inductive SD.

66 It has long been known that in day-length responsive species, inductive photoperiod is  
67 mainly perceived in leaves where it results in the formation of a long-distance signal,  
68 or florigen, that moves to the SAM to induce the transition to flowering (An et al., 2004;  
69 Corbesier et al., 2007; Mathieu et al., 2007). The molecular nature of florigen has  
70 eluded identification for the better part of a century. However, recently *FLOWERING*  
71 *LOCUST (FT)* and related genes, which encode for phosphatidylethanolamine-binding  
72 proteins (PEBP), have been identified as evolutionary conserved candidates (Corbesier  
73 et al., 2007; Mathieu et al., 2007). Under inductive photoperiod, *FT* is expressed in leaf  
74 phloem companion cells (PCC) and there is good evidence that the FT protein is loaded  
75 into the phloem sieve elements and transported to the SAM (reviewed in (Song et al.,  
76 2015; Srikanth and Schmid, 2011)). At the SAM, FT interacts with FD and 14-3-3  
77 proteins and the resulting flowering-activation complex (FAC) is thought to control the  
78 correct expression of flowering time and floral homeotic genes to promote the transition  
79 of the vegetative meristem into a reproductive inflorescence meristem (Abe et al., 2005;  
80 Taoka et al., 2011; Wigge et al., 2005).

81 FD belongs to the group A of the bZIP transcription factor (TF) family (Jakoby et al.,  
82 2002) and is mainly expressed at the SAM (Abe et al., 2005; Schmid et al., 2005; Wigge  
83 et al., 2005). It has been proposed that, in order to interact with FT and 14-3-3 proteins,  
84 FD must be phosphorylated at threonine 282 (T282) (Abe et al., 2005; Taoka et al.,  
85 2011; Wigge et al., 2005). Recently, two calcium-dependent kinases expressed at the  
86 SAM, CPK6 and CPK33, have been shown to phosphorylate FD (Kawamoto et al.,  
87 2015). FD interacts not only with FT but also with other members of the PEBP protein

88 family. Interestingly, some of the six PEBP proteins encoded in the *A. thaliana* genome  
89 regulate flowering in opposition. FT and its paralog TWIN SISTER OF FT (TSF)  
90 promote flowering. Mutations in *tsf* enhance the late flowering phenotype of *ft* in LD  
91 but in addition *TSF* also has distinct roles in SD (Yamaguchi et al., 2005). Other  
92 members of the PEBP protein family, most prominently TERMINAL FLOWER 1  
93 (TFL1), oppose the flower-promoting function of FT and TSF, and repress flowering.  
94 The Arabidopsis ortholog of CENTRORADIALIS (ATC) has been shown to act as a  
95 SD-induced floral inhibitor that is expressed mostly in the vasculature but was  
96 undetectable at the SAM. Furthermore, ATC has been suggested to move over long  
97 distances and can interact with FD to inhibit *APETALAI* (*API*) expression. ATC has  
98 thus been proposed to antagonize the flower-promoting effect of FT (Huang et al.,  
99 2012). Similarly, orthologs of ATC in rice (RCNs) have been recently showed to  
100 antagonize with FT-like protein (Kaneko-Suzuki et al., 2018). Finally, BROTHER OF  
101 FT (BFT) interacts with FD in the nucleus, interfering with FT function under high  
102 salinity and inhibiting *API* expression, thereby delaying flowering (Ryu et al., 2014).  
103 TFL1 differs from FT only in 39 non-conserved amino acids but as mentioned above  
104 has an opposite biological function: TFL1 represses flowering while FT is a floral  
105 promoter (Ahn et al., 2006). It has been demonstrated that substitutions of a single  
106 amino acid (TFL1-H88; FT-Y85) or exchange of the segment B encoded by the fourth  
107 exon are sufficient to impose TFL1-like activity onto FT, and *vice versa* (Ahn et al.,  
108 2006; Hanzawa et al., 2005; Ho and Weigel, 2014). Similar to FT, TFL1 also interacts  
109 with FD, both in yeast-2-hybrid assays as well as in plant nuclei (Hanano and Goto,  
110 2011; Wigge et al., 2005). Together, these findings suggest that activating FD-FT and  
111 repressive FD-TFL1 complexes compete for binding to the same target genes (Ahn et  
112 al., 2006). Support for this hypothesis stems from the observation that TFL1 apparently  
113 acts to repress transcription (Hanano and Goto, 2011) whereas FT seems to function as  
114 a transcriptional (co-) activator (Wigge et al., 2005). However, evidence that these  
115 protein complexes in fact share interactors such as 14-3-3 proteins or control the same  
116 targets remains sparse.

117 FD has been reported as direct and indirect regulator of important flowering time and  
118 floral homeotic genes such as *SUPPRESSOR OF OVEREXPRESSION OF CONSTANS*  
119 *1* (*SOCI*), *SQUAMOSA PROMOTER BINDING PROTEIN-LIKE 3* (*SPL3*), *SPL4*,  
120 *SPL5*, *LEAFY* (*LFY*), *API*, and *FRUITFULL* (*FUL*). Several flowering time pathways  
121 contribute to *SOCI* regulation. Indeed, it has been proposed that expression of *SOCI*  
122 can be directly promoted by the FD-FT complex (Lee and Lee, 2010). However, *SOCI*

123 expression can also be activated independently from FD-FT probably through the  
124 SPL3, SPL4, and SPL5 proteins (Lee and Lee, 2010; Moon et al., 2003; Wang et al.,  
125 2009), which have been shown to be directly or indirectly activated by the FD-FT  
126 complex (Jung et al., 2012). The activation of floral homeotic genes such as *API* and  
127 *FUL* in response to FD-FT activity at the SAM can at least in part be explained by the  
128 direct activation of the floral meristem identity gene *LFY* through SOC1 (Jung et al.,  
129 2012; Moon et al., 2005; Yoo et al., 2005). In addition, it has also been proposed that  
130 FD-FT complex can promote the expression of *API* and *FUL* by directly binding to  
131 their promoters (Abe et al., 2005; Teper-Bamnolker and Samach, 2005; Wigge et al.,  
132 2005). Taken together, these results support a central role for FD in integrating different  
133 pathways to ensure the correct timing of flowering. However, FD targets have not yet  
134 been identified at the genome scale, nor has the requirement for protein complex  
135 formation for FD function in *A. thaliana* been systematically addressed.

136 Here we identify direct and indirect targets of FD at the genome scale using ChIP-seq  
137 and RNA-seq in wildtype as well as in *ft-10 tsf-1* double mutants. This demonstrates  
138 that FD can bind to DNA *in vivo* even in the absence of FT/TSF. However, FD binding  
139 to a subset of targets, which includes many important flowering time and floral  
140 homeotic genes, was reduced in the *ft-10 tsf-1* double mutant, strongly supporting a role  
141 for FT/TSF in modulating FD DNA binding and expression of functionally important  
142 target genes. In addition, we report the effects of FD phosphorylation on protein  
143 complex formation with FT and TFL1 via 14-3-3 proteins *in vitro* and show how  
144 phosphorylation of FD affects flowering time *in planta*. Finally, our ChIP-seq  
145 experiments identified hundreds of previously unknown FD target genes, both in the  
146 PCCs as well as at the SAM. For example, we observed that FD directly binds to and  
147 regulates genes in hormone signaling pathways. These newly identified FD target genes  
148 represent a precious resource not only to enhance our knowledge of the photoperiod  
149 pathway but also to better understand the integration of different signaling pathways at  
150 the transcriptional level. Taken together, our findings support a role for FD as a central  
151 integrator of flowering time and provide important novel data to guide future research  
152 on the integration of diverse signaling pathways at the SAM.

## 153 RESULTS

### 154 FD binds G-box motives when expressed in PCCs

155 FD is normally expressed at the shoot apical meristem (SAM) whereas its interaction  
156 partner FT is expressed in leaf phloem companion cells (PCC). As most 14-3-3 proteins  
157 are ubiquitously expressed at moderate to high levels and have also been detected in  
158 PCCs (Deeken R. et al., 2008; Schmid et al., 2005), we reasoned that expression of FD  
159 from the PCC-specific *SUC2* promoter would maximize FAC complex formation and  
160 enable us to investigate the role of FT in modulation of FD transcriptional activity.

161 We performed ChIP-seq on independent biological duplicates in a stable  
162 *pSUC2::GFP:FD* reporter line in Col-0 background using *pSUC2::GFP:NLS*, in which  
163 the GFP protein is fused to the nuclear localization signal (NLS), as a control. A total  
164 of 2068 and 3236 genomic regions showing significant enrichment (peaks) were  
165 identified in the first and second replicate, respectively (Fig. S1A). Overlapping results  
166 from the two biological replicates identified 1754 high-confidence peaks shared in both  
167 experiments (Fig. S1 A, Supplemental Data Set 1) and only this subset of peaks, which  
168 include important flowering time and flower development genes such as *API*, *FUL*,  
169 *LFY*, *SOCl*, *SEP1*, *SEP2*, *SEP3*, was used for further analysis. In both replicates, the  
170 majority of the peaks mapped to promoter regions (65,1% and 63.8%, respectively),  
171 followed by intergenic regions (16% and 16.8%), transcriptional terminator sites (9.2%  
172 and 10.7%), exons (6.4% and 5.6%) intron (2.4% and 2.3%), 5'-UTR (0.5% and 0.3%),  
173 and 3'-UTR (0.4% and 0.5%) (Fig. 1A). The relative enrichment of peaks mapping to  
174 promoter regions is in agreement with what is expected from a transcriptional regulator.  
175 In both replicates, the majority of the peaks are located between 600 bp and 300 bp  
176 upstream the nearest transcription start site (TSS) (Fig. S1D, G). *De novo* motif analysis  
177 using MEME-ChIP (Machanick and Bailey, 2011) revealed that peak regions showed  
178 a strong enrichment of G-boxes (CACGTG), which is a canonical bZIP binding site  
179 (Fig. S1J). The subset of 1754 peak regions was associated with 1676 unique genes,  
180 with 68 genes containing more than one inferred FD binding site. Taken together, these  
181 results demonstrate that, when misexpressed in the PCCs, FD is capable of binding to  
182 G-box elements in a large number of genes that are involved in diverse aspects of the  
183 plant life cycle.

184

### 185 FT and TSF enhance binding of FD to DNA

186 To test whether FT and its paralog TSF are required for FD to bind to DNA, the  
187 *pSUC2::GFP:FD* reporter and *pSUC2::GFP:NLS* control constructs were transformed

188 into the *ft-10 tsf-1* mutant background. Results from two independent biological  
189 replicates show that FD is capable of binding to DNA even in the absence of *FT* and  
190 *TSF*. Most peaks (63% and 62.1% in the first and second biological replicate,  
191 respectively) mapped to promoter regions within 600 bp and 300 bp nucleotides  
192 upstream the nearest TSS (Fig. S1B, E, H). Overall, these results are very similar to  
193 those observed for *pSUC2::GFP:FD* in Col-0 (Fig. 1A, Fig. S1B, E, H, K ).

194 Comparison between the two biological replicates identified 2696 common peaks in *ft-*  
195 *10 tsf-1* mutant that mapped to 2504 unique genes (Fig. S1B, Supplemental Data Set  
196 2). Surprisingly, overlapping the sets of genomic regions bound by FD with high-  
197 confidence in WT (1754) and *ft-10 tsf-1* (2696) identified 1530 shared peaks (Fig. 1B,  
198 Supplemental Data Set 3), suggesting that FD is capable of binding to most of its targets  
199 in the absence of FT and TSF. Analysis of the sequence under the 1530 shared peaks  
200 revealed that FD maintained its strong preference for binding to G-box motifs (Fig.  
201 1C).

202 Analysis of differential bound (DB) regions revealed that, although FT and TSF were  
203 not required for FD to bind DNA, their presence increased the strength of the binding  
204 and this was sufficient to discriminate the two genetic backgrounds (Fig. 1D). A total  
205 of 885 DB regions with a FDR < 0.05 were found between WT and *ft-10 tsf-1* and  
206 almost all of these loci showed higher enrichment in WT (Fig. 1E, Supplemental Data  
207 Set 4). Interestingly, this subset includes important floral homeotic genes such as *AP1*,  
208 *SEP1*, *SEP2*, and *FUL*, as well as two members of the *SPL* gene family, *SPL7* and  
209 *SPL8*. We also found FD bound to the second exon of *LFY*, a master regulator of flower  
210 development (Fig. 1F). In addition, we detected binding to loci encoding genes  
211 involved in the regulation of gibberellic acid biosynthesis and degradation such as  
212 *GA2OX4*, *GA2OX6*, and *GA3OX1* as well as to three key components of the circadian  
213 clock, *CCA1*, *LHY*, and *TIC* (Supplemental Data Set 4).

214 To test the robustness of our results and any possible bias due to the different genetic  
215 backgrounds used as controls, Col-0 and *ft-10 tsf-1*, peaks were called again using  
216 *pSUC2::GFP:NLS* in Col-0 as single negative control. Analysis identified 917 DB (Fig.  
217 S2), which is comparable to the 885 DB genes from the previous analysis (Fig. 1E). In  
218 addition, affinity test analysis clustered by genotype rather than the control used (Fig.  
219 S2), ruling out a bias due to the usage of different genetic backgrounds for peak calling.  
220 Importantly, FD is capable of inducing the known FAC target gene *AP1* in leaves when  
221 expressed under the *pSUC2* promoter, suggesting that a functional FAC can be formed  
222 in the phloem companion cells when FD is present (Fig. S3A). The finding that *AP1*

223 expression could only be observed in the Col-0 background but not in *pSUC2::GFP:FD*  
224 *ft-10 tsf-1* further supports this interpretation. However, in contrast to *API*, we failed to  
225 detect induction of *SOC1* in the PCCs of *pSUC2::GFP:FD* (Fig.S3A), suggesting that  
226 other co-factor(s) that are probably specifically expressed at the SAM might be required  
227 to fully activate FD target gene expression.

228

### 229 **FD phosphorylation is required for complex formation and to promote flowering**

230 To verify the binding of FD to G-boxes *in vitro* we performed electrophoretic mobility  
231 shift assays (EMSA) using the bZIP domain of the *A. thaliana* FD protein (FD-C) and  
232 a 30bp fragment from the *SEP3* promoter containing a G-box that we had identified as  
233 FD target region in our ChIP-seq (Fig. 1F) as a probe. We observed weak binding of  
234 FD-C, but failed to detect higher order complexes when 14-3-3, FT, or both were added  
235 (Fig. 2A). In contrast, a clear supershift with 14-3-3 and FT was observed when a  
236 phosphomimic variant of FD-C, FD-C\_T282E, was used (Fig. 2B). Interestingly,  
237 TFL1, which is similar to FT in structure (Ahn et al., 2006) but delays flowering, was  
238 capable of forming a complex with 14-3-3 and wildtype FD-C (Fig. 2A). Similar results  
239 were obtained with the full-length version of FD (Fig. S4A). Taken together, these  
240 results demonstrate that *A. thaliana* FD is capable of binding to DNA without FT,  
241 confirming results from our ChIP-seq experiments. Furthermore, our results suggest  
242 that the unphosphorylated form of FD, in complex with 14-3-3 proteins, can interact  
243 with TFL1.

244 To investigate the importance of FD phosphorylation *in vivo* we complemented the *fd-*  
245 *2* mutant with *pFD::FD*, *pFD::FD-T282E*, and *pFD::FD-T282A* (which cannot be  
246 phosphorylated) and determined flowering time of homozygous transgenic plants.  
247 Plants transformed with the WT version of FD rescued the late flowering phenotype of  
248 *fd-2*, indicating that the rescue construct was fully functional. In contrast, plants  
249 transformed with the T282A version flowered with the same number of leaves as *fd-2*,  
250 demonstrating that FD needs to be phosphorylated to induce flowering. Interestingly,  
251 plants transformed with the T282E phosphomimic version of FD flowered even earlier  
252 than WT (Fig. 3), indicating that control of FD phosphorylation is important for its  
253 function *in vivo*. To test whether serine 281 (S281), which is located next to T282,  
254 constitutes a potential FD phosphorylation site, we complemented *fd-2* with *pFD::FD-*  
255 *S281E* and *pFD::FD-S281E/T282E* constructs. Interestingly, these lines flowered as  
256 early as plants transformed with the phosphomimic version T282E (Fig. 3), indicating  
257 that S281 could be a possible FD phosphorylation site but that double-phosphorylation



258 of S281/T282 does not accelerate flowering any further. These *in vivo* results are in  
259 agreement with our EMSA results and confirm that phosphorylation of FD is required  
260 for its function and needs to be finely regulated in order to avoid either premature or  
261 delayed flowering. It should be noted, however, that the phosphomimic version of the  
262 C-terminal fragment of FD (as used in the EMSA analyses) is insufficient to fully  
263 rescue the late flowering of *fd-2* (Fig. S3B), suggesting that the N-terminal region of  
264 FD, even though it does not contain any known functional domains, nevertheless  
265 contributes to FD function.

266

### 267 **Targets of FD at the SAM**

268 The rationale for carrying out the initial ChIP-seq experiments in PCCs was to  
269 maximize the likelihood of FAC formation and to study the contribution of FT/TSF to  
270 FD DNA binding. However, since our ChIP-seq and EMSA results indicated that FD-  
271 FT interaction is not required for FD to bind to DNA, we decided to determine direct  
272 targets of FD in its natural context at the SAM.

273 To this end we performed ChIP-seq using a *fd-2* mutant that had been complemented  
274 using a *pFD::GFP:FD* construct (Fig. S3C). ChIP-seq was performed using two  
275 independent biological replicates from apices of 16-day-old plants grown in LD  
276 condition. In the two replicates, we could identify 703 and 1222 FD-bound regions,  
277 respectively, of which 595 were shared between the replicates (Fig. S1C, Supplemental  
278 Data Set 5). Of these, 69.7% mapped to core promoter regions within 300 to 600 bp  
279 upstream of the nearest TSS, 15.8% in intergenic regions, followed by TTS (6.2%),  
280 exons (5.9%), introns (1.8%) and 5'-UTRs (0.5%) (Fig. 1G, Fig. S1F, I). Similar to the  
281 situation in our PCC-specific ChIP-seq analyses we found a G-box as the most  
282 overrepresented transcription factor binding site under the peak region (Fig. 1H, Fig.  
283 S1L). The 595 peak regions shared between the replicates mapped to 572 individual  
284 genes, which we consider high-confidence *in vivo* targets of FD at the SAM and which  
285 include important flowering-related genes such as *API*, *FUL*, *SOC1*, and *SEP3*.

286 The precise location of the FD binding site in the *API* promoter has been discussed  
287 controversially (Benlloch et al., 2011; Wigge et al., 2005). Taking into account all six  
288 ChIP-seq datasets, we were able to extract a 64 bp sequence covering the peak summits  
289 on the *API* promoter (Fig. 4A,B). Interestingly, this sequence lies about 100 bp  
290 downstream of a C-box that had previously been implicated in FD binding to *API*  
291 (Wigge et al., 2005), but contains several palindromic sequences. However, none of  
292 them is a *bona fide* G-box. We selected three potential binding sites within the 64 bp

293 sequence and tested them, along with the upstream C-box, by EMSA for FD binding  
294 (Fig. 4C, S4B). Results show that only the phosphomimic version of FD-C (FD-  
295 C\_T282E) in combination with 14-3-3 can bind to DNA. Furthermore, a supershift is  
296 detected for all palindromic sites tested, included the C-box, when TFL1 is added. In  
297 contrast, for FT an additional shift resembling the pattern obtained with the G-box in  
298 *SEP3* promoter was only observed for “site 2” (Fig. 4C, 2B). Closer inspection of the  
299 nucleotide sequences of the probes used for the G-box in the *SEP3* promoter and the  
300 “site 2” in the *API* promoter revealed that the possible FD binding site in the *API*  
301 promoter (GTCGAC) is also present in the *SEP3* promoter, where it overlaps with the  
302 G-box (Fig. 4D). Interestingly, in the context of the *SEP3* probe, full-length FD and  
303 FD-C tolerated mutating the core of the G-box from CG to GC, whereas CG to TA  
304 mutations as well as converting the G-box to a C-box (GACGTC) abolished binding *in*  
305 *vitro* (Fig. S4D). To further test the site 2 on *API* promoter as real binding site of FD,  
306 we mutated its core from CG to TA and checked whether this was sufficient to abolish  
307 the FD binding. Results show that indeed the binding of FD was strongly abolished  
308 except in the presence of TFL1 (Fig. S4E).

309 Take together our findings exclude the C-box as the FD binding site in the *API*  
310 promoter. Furthermore, our results suggest that FD can bind other motifs as well,  
311 possible through interaction with interaction partners other than 14-3-3 and FT/TSF,  
312 and we characterized a new binding site (GTCGAC) that could be the most likely real  
313 FD binding site in *API* promoter.

314

### 315 **Differentially expressed genes at the SAM and direct targets of FD**

316 To test which of the 595 high confidence targets we had identified by ChIP-seq at the  
317 SAM were actually transcriptionally regulated by FD we performed RNA-seq on apices  
318 from *fd-2* mutant and the *pFD::GFP:FD fd-2* rescue line. 21 day-old SD-grown  
319 seedlings were shifted to LD to synchronize flowering and apices were harvested on  
320 the day of the transfer to LD (T0), as well as 1, 2, 3, and 5 days after the shift (T1, T2,  
321 T3, T5) from three independent biological replicates.

322 Differentially expressed (DE) genes were called for each time point and genes with an  
323 adjusted p-value (padj) lower than 0.1 were selected as significantly DE. In total 1759,  
324 583, 2421, 924, and 153 DE genes were identified in T0, T1, T2, T3, and T5,  
325 respectively, corresponding to 4189 unique genes (Fig. 5A, Supplemental Data Set 6).  
326 PCA analysis showed that the first and second principal component, which explain 37%  
327 and 21% of the total variance, corresponded to the different time points and genotypes,

328 respectively (Fig. S5A). The best separation between the genotypes in the PCA was  
329 observed at T3 and T5, indicating that FD contributes to the transcriptional changes at  
330 the SAM mainly after exposure to two long days. This observation is in agreement with  
331 the expression profile of FD, which in the *pFD::GFP:FD* rescue line increased after  
332 T2 (Fig. S5B). In contrast, FD expression remained low in the *fd-2* mutant, indicating  
333 the validity of our experimental approach (Fig. S5B).

334 Next, we intersected the list of genes that were bound by FD at the SAM (572) with the  
335 list of DE genes (4189). In total, 135 (23.6%) of the 572 FD-bound genes were  
336 significantly DE at the SAM during the transition to flowering at least at one timepoint,  
337 indicating that these genes are transcriptionally regulated by FD, which is more than  
338 expected by chance (Fig. 5B, C, Supplemental Data Set 7). Among the 135 directly  
339 bound and differentially expressed FD targets we observed several previously known  
340 FD-regulated flowering time and floral homeotic genes including *API1*, *FUL*, and *SOCI*  
341 (Fig. 1F, S6A). In addition, this set of high-confidence FD targets contained also the  
342 MADS box gene *SEP3*, the promoter of which is bound by FD and which is down-  
343 regulated in *fd-2* mutant (Fig. 1F, S6A). Interestingly, we did not observe binding of  
344 FD to any of the other members of *SEPALLATA* gene family in ChIP-seq samples from  
345 the SAM, although we did detect FD binding in promoter regions of *SEPI* and *SEP2*,  
346 but not *SEP4*, in ChIP-seq from seedlings in which FD had been misexpressed from the  
347 *SUC2* promoter. One possible explanation for this is that the ChIP-seq at the SAM  
348 apparently worked less efficiently and identified fewer FD targets (1754 vs. 595), which  
349 might result in a larger number of false negatives. In agreement with this interpretation,  
350 *SEPI* is down-regulated in *fd-2* mutant (Fig. S6), indicating that FD directly or  
351 indirectly regulates the expression of *SEPI* at the SAM. Interestingly, we also found  
352 FD bound to *TPR2*, a member of the *TOPLESS (TPL)-related* gene family. TPL and its  
353 family members (*TPR1*, *TPR2*, *TPR3* and *TPR4*) are strong transcriptional co-  
354 repressors and they interact with other proteins throughout the plant to modulate gene  
355 expression (Causier et al., 2012). *TPR2* is down-regulated in the *fd-2* mutant throughout  
356 floral transition from T0 to T5 (Fig. S6), indicating FD might regulate development at  
357 the SAM through *TPR2* in a photoperiod-independent manner. Gene Ontology (GO)  
358 analysis of these 135 genes that were bound and differentially expressed by FD revealed  
359 significant enrichment in several biological process categories (Fig. S7), including  
360 “flower development” and “maintenance of inflorescence meristem identity”, as one  
361 might expected for a flowering time regulator such as FD. More surprisingly, however,  
362 genes related to the “response to hormone” category were also significantly

363 overrepresented (Supplemental Data Set 8). Among these 27 genes are four genes best  
364 known for their role in jasmonate signaling (*MYC2*, *JAZ3*, *JAZ6* and *JAZ9*), three genes  
365 directly connected to auxin signaling (*ARF18*, *WES1*, and *DFL1*), four genes involved  
366 in abscisic acid signaling (*ALDH33II*, *ATGRDPI*, *HAI1* and *PP2CA*), and the  
367 flowering-related gene *SOC1*, which is well-known to be regulated by gibberellins  
368 (Supplemental Data Set 8). Closer inspection of the expression profiles of these 27  
369 candidate genes revealed that *ARF18* showed a trend similar to *SOC1*, being strongly  
370 induced after T2 in Col-0 but not in *fd-2*. The four jasmonate-related genes showed a  
371 peculiar expression profile in *fd-2*, *i.e.* an increase from T0 to T1, decrease in T2,  
372 another increase in T3, and decreasing in T5. Since this peculiar expression profile was  
373 observed in three *JAZ* genes, we checked the remaining genes in this family and found  
374 that 11 out of 13 displayed the same pattern (Fig. S6). Furthermore, this profile was  
375 also observed in three other genes (*DMR6*, *ESP* and *TOE2*), all of which have  
376 previously been implicated in pathogen resistance and the jasmonate pathway (Fig.  
377 S7B). Taken together, these results suggest that FD plays an active role not only in the  
378 regulation of flowering time but also functions as a hub for different hormone signaling  
379 pathways.

380

### 381 **Validation of FD targets**

382 We selected a subset of putative FD direct target genes and determined their expression  
383 in early flowering FD overexpression lines (*p35S::FD*) and Col-0. To minimize any  
384 bias due to the early flowering of *p35S::FD*, experiments were carried out in vegetative  
385 7-day-old LD-grown seedlings. For validation, we selected genes known to play a  
386 major role in floral transition, genes that according to Gene Ontology are involved in  
387 flowering time and floral development, and other genes that showed a marked  
388 differential expression in *fd-2* but for which a role in flowering time regulation had not  
389 previously been studied in detail. qRT-PCR assays confirmed that both *SOC1* and *API*  
390 were strongly up-regulated in *p35S::FD* (Fig. 6). Although we had only found *SEP3* to  
391 be bound by FD in the SAM ChIP-seq analysis, we tested expression of all four  
392 *SEPALLATA* genes (*SEP1* – *SEP4*) in the *p35S::FD* line. *SEP3* was the only *SEP* gene  
393 that was strongly induced in seedlings in response to *FD* overexpression, while *SEP1*  
394 and *SEP2* showed only moderate induction. In contrast, expression of *SEP4* did not  
395 show difference between *p35S::FD* and Col-0 (Fig. 6). Interestingly, *SEP1*, *SEP2*, and  
396 *SEP3* were also bound by FD in PCC-specific ChIP-seq in seedlings and *SEP1* and  
397 *SEP3* displayed strong DE in RNA-seq (Fig. S6). *ASI*, which has been demonstrated to

398 be involved in flowering time by regulation of *FT* expression in leaves (Song et al.,  
399 2012), did not show significant difference in expression between Col-0 and *p35S::FD*.  
400 We also tested two FRIGIDA-like genes, *FRI-like 4a* and *FRI-like 4b*, of which *FRI-*  
401 *like 4b* showed a decreased expression in *p35S::FD*. In addition, we also tested two  
402 genes, *MYC2* and *AFR1*, which were bound by FD in both the *pSUC2* and *pFD* ChIP-  
403 seq experiments, differentially expressed at the SAM, but not differentially bound in *ft-*  
404 *10 tsf-1* mutant, *i.e.* not directly influenced by the presence of FT and TSF, for their  
405 contribution to flowering time regulation. *MYC2* showed no differences in expression  
406 in *p35S::FD* compared to Col-0, whereas *AFR1* was up-regulated in *p35S::FD* (Fig. 6).  
407 To genetically test the role of these two genes in the regulation of flowering we isolated  
408 T-DNA insertion lines and determined their flowering time under LD at 23°C. Both  
409 *myc2* and *afir1* were significantly early flowering, both as days to flowering and total  
410 leaf number, compared to WT (Fig. 7), confirming their role in regulating the floral  
411 transition.

## 412 **DISCUSSION**

413 *FD* was originally identified as a component of the photoperiod-dependent flowering  
414 pathway in *A. thaliana* based on the late flowering phenotype of the loss-of-function  
415 mutant (Koornneef et al., 1991). *FD*, which encodes a bZIP transcription factor, is  
416 expressed in the SAM prior to floral transition but does not induce flowering alone.  
417 Later, it was demonstrated that *FD* physically interacts with *FT*, the florigen, and that  
418 this interaction is important for its function as a promoter of flowering (Abe et al., 2005;  
419 Wigge et al., 2005). In addition, *FD* was found to also interact with *TFL1*, which is  
420 normally expressed in the SAM and antagonizes the function of *FT* as floral activator.  
421 This and other findings led to the hypothesis that *FD* is held in an inactive state through  
422 *TFL1* interaction in the vegetative SAM. When *FT* is induced in the PCCs and  
423 transported to the SAM in response to inductive photoperiod, *FT* competes with *TFL1*  
424 for interaction with *FD*, eventually resulting in the formation of transcriptionally active  
425 *FD-FT* complexes (Ahn et al., 2006). However, the exact molecular mechanisms of *FD*  
426 action and its genome-wide targets remained largely unknown. Here we employed  
427 biochemical, genomic, and transcriptomic approaches to clarify the role of *FD* in the  
428 regulation of flowering transition in *A. thaliana*.

429 We found that neither *FT* nor *TSF* are required for *FD* to bind to DNA but that their  
430 presence increases the strength of *FD* binding on a subset of target loci, which encode  
431 known flowering time and floral homeotic genes such as *API*, *SEPI*, *SEP2*, and *FUL*.  
432 Our data are compatible with the model described by (Ahn et al., 2006), according to  
433 which *FT* acts as a transcriptional coactivator. Without *FT*, *FD* is still capable of  
434 binding DNA but does not seem to activate transcription. In this context, our EMSA  
435 results are of particular interest as they demonstrate that, at least *in vitro*, *TFL1* is  
436 capable of interacting with unphosphorylated *FD* via 14-3-3 proteins, suggesting that  
437 the transcriptionally inactive ternary *FD/14-3-3/TFL1* complex is the ground state at  
438 the SAM. Only after *FD* has been phosphorylated can *FT*, together with 14-3-3 proteins,  
439 form an active FAC to induce flowering. This requirement for phosphorylation of T282  
440 of *FD* adds another safeguard to the system that might help to prevent disastrous  
441 premature induction of flowering. Our results clearly suggest that phosphorylation is  
442 important for *FD* function and add to our understanding concerning the role of *FD*  
443 phosphorylation, which had mostly been based on the analyses of a *FD/14-3-3/Hd3a*  
444 complex in rice using a short *FD* peptide (Kaneko-Suzuki et al., 2018; Taoka et al.,  
445 2011).

446 Which kinases regulate phosphorylation of FD *in vivo* has been a matter of debate, but  
447 recently two calcium-dependent kinases, CPK6 and CPK33, have been shown to  
448 phosphorylate FD (Kawamoto et al., 2015). Building on this, we show that expression  
449 of a non-phosphorable version of the FD protein (T282A) under the control of the *pFD*  
450 promoter failed to rescue the late flowering of *fd-2*. In contrast, expression of a  
451 phosphomimic version of FD (T282E) resulted in early flowering when expressed in  
452 *fd-2*. Similar results were obtained using a S281E phosphomimic FD. These results  
453 indicate that the phosphorylation of FD must be tightly controlled to prevent premature  
454 flowering. Interestingly, both CPK6 and CPK33 are more strongly expressed in  
455 transition apices than they are in vegetative apices (Schmid et al., 2005), which would  
456 be in agreement with an activation of FD by these two kinases during floral induction.  
457 Somewhat surprisingly we observed that the C-terminal part of the FD protein, which  
458 includes the bZIP domain and the phosphorylation site, was sufficient to trigger  
459 complex formation with FT (and TFL1) and 14-3-3 proteins. This suggests that the N-  
460 terminal region of FD, which is predicted to be highly unstructured and contains a  
461 stretch of 25 amino acids containing 19 serine residues, might be dispensable for  
462 FD/14-3-3/FT complex formation. However, the N-terminal region of FD is  
463 evolutionarily conserved, indicating that it may contribute to FD function. This notion  
464 is supported by our observation that expression of the C-terminal part of FD in plants  
465 only partially restored the late flowering of *fd-2* mutants.

466 Part of the flowering promoting activity of FD can probably be expressed through its  
467 effect on members of the *SEP* gene family of MADS-domain transcription factors,  
468 which are required for the activity of the A-, B-, C-, and D-class floral homeotic genes  
469 (reviewed in Theissen et al., 2016). In addition to its function as a floral homeotic gene,  
470 *SEP3* has also been reported to promote flowering by accumulation in leaves under FT  
471 regulation (Teper-Bamnolker and Samach, 2005) and as downstream target of the  
472 miR156-SPL3-FT module in response to ambient temperature (Hwan Lee et al., 2012).  
473 However, how *SEP3* is regulated at the SAM has remained unclear. Interestingly, we  
474 found that FD bound strongly to the *SEP3* promoter and *SEP3* is downregulated in the  
475 *fd-2* mutant. As FD also binds to the promoter and activated expression of the A-class  
476 gene *API*, FD activity might be sufficient to induce formation of sepals, which form  
477 the outmost floral whorl, and which according to the quartet model require the  
478 formation of a SEP/AP1 complex (Theissen et al., 2016). However, it should be noted  
479 that *fd* mutants do not display notable homeotic defects, indicating that FD is clearly  
480 not the only factor regulating *SEP3* and *API* expression. Furthermore, binding of FD

481 to *API* is unlikely to be mediated by a C-box as previously suggested (Taoka et al.,  
482 2011; Wigge et al., 2005) as the summits of the ChIP-seq peaks do not cover this region  
483 of the *API* promoter. Interestingly, this region contains several palindromic sequences,  
484 one or more of which most likely mediate FD binding to the *API* promoter.  
485 Another interesting outcome of our analyses is that FD might contribute to the  
486 regulation of other processes in the plant besides flowering. In particular, we found that  
487 FD directly regulated the expression of genes involved in several hormone signaling  
488 pathways. For example, we observed FD binding to the promoter of *MYC2*, a bHLH  
489 transcription factor that plays a key role in jasmonate response. It has been shown that  
490 *MYC2* forms a complex with JAZ proteins and the TPL co-repressor, and that this  
491 interaction is dependent on NINJA proteins (Pauwels et al., 2010). In this context it is  
492 noteworthy that FD also bound directly to the promoter of *TPR2* promoter and that  
493 *TPR2* was strongly downregulated in *fd-2*. This finding indicates that FD not only  
494 regulates *MYC2* but also at least some of the interacting TPL-like transcriptional co-  
495 repressors. Finally, we also observed strong binding of FD to (and misexpression of) a  
496 number of JAZ genes in either PCCs and/or the SAM in our ChIP-seq and RNA-seq  
497 data. Taken together, this indicates that FD may control the expression of three core  
498 components of jasmonate signaling: *MYC2*, *TPR2*, and several *JAZ* genes. These results  
499 support earlier findings that had reported a link between jasmonate signaling  
500 components and flowering time regulation. JAZ proteins have been shown to regulate  
501 flowering in leaves through the direct interaction with the floral repressors TOE1 and  
502 TOE2, which is also bound by FD and differentially expressed in *fd-2*, and the  
503 regulation of FLC that negatively regulate *FT* expression (Zhai et al., 2015). Moreover,  
504 *MYC2* has also been reported to affect flowering time by regulating *FT* expression in  
505 leaves (Wang et al., 2017; Zhai et al., 2015). However, previous publications had  
506 reported contradictory results concerning the flowering phenotype of the *myc2* mutant,  
507 ranging from late flowering (Gangappa and Chattopadhyay, 2010) to early flowering  
508 (Wang et al., 2009) or no obvious effect (Major et al., 2017). In our conditions the *myc2*  
509 mutant showed an early flowering time compared to Col-0, which in agreement with  
510 the report from Wang and colleagues (Wang et al., 2009) (Fig. 7). We also identified  
511 *ARF18*, a member of the auxin response factors protein family, as direct target of FD.  
512 Notably, the expression of *ARF18* is strongly induced after T2 in Col-0 but not in *fd-2*  
513 and this pattern is the same of known direct FD targets, e.g.: *API* and *SOCI*. Moreover,  
514 *ARF18* is also induced at the SAM during floral transition (Schmid et al., 2005)  
515 providing further evidence for a possible link between FD and *ARF18*. In summary, our



516 findings suggest a link between the photoperiodic pathway gene *FD* and hormone  
517 signaling pathways. Although further experiments will be necessary to better  
518 understand this connection, we hypothesize that linking hormone signaling to flowering  
519 time through *FD* regulation might allow plants to fine tune their flowering time  
520 response to abiotic and biotic stresses.

521 Apart from connecting *FD* with hormone signaling we characterized another target  
522 gene in more detail. *AFRI*, which encodes a putative histone deacetylase subunit, had  
523 previously been shown to negatively affect the expression of *FT* in the leaves and *afr1*  
524 mutations cause early flowering (Fig. 7)(Gu et al., 2013). Our results suggests that *FD*  
525 might modulate flowering through ARF1-mediated regulation of chromatin. However,  
526 such regulation would most likely not be mediated by *FT*, as *FT* is normally not  
527 expressed at the SAM.

528 Taken together, our results support the role of *FD* as a key regulator of photoperiod-  
529 induced flowering and the expression of A- and E-class floral homeotic genes in *A.*  
530 *thaliana*. Furthermore, *FD* might play an important role in coordinating the crosstalk  
531 between the photoperiod pathway and hormone signaling pathways, and provide a  
532 convergence point for diverse environmental and endogenous signaling pathways. .

533

534

## 535 **METHODS**

### 536 **Plant materials and growth conditions**

537 *Arabidopsis thaliana* accession Col-0 was used as wild-type. Mutants investigated in  
538 this study are: *fd-2* (SALK\_013288), *ft-10* (GABI\_290E08), *tsf-1* (SALK\_087522),  
539 *myc2* (SALK\_017005), *arf1* (SALK\_026979) (Tab. S1). Seeds were stratified for 3  
540 days in 0.1% agar in the dark at 4°C and directly planted on soil. Plants were grown on  
541 soil under long day (16 hours of light and 8 hours of night) or under short day (8 hours  
542 of light and 16 hours of night) at 23°C, 65% relative humidity. Plants used for flowering  
543 time measurements were grown in a randomized design to reduce location effects in  
544 the growth chambers.

545

### 546 **DNA vectors and plant transformation**

547 DNA vectors used in this study are listed in table S2. Coding sequences were amplified  
548 by PCR from cDNA and cloned into either pGREEN-IIS vectors for flowering time  
549 studies or pET-M11 vectors for protein expression. Final constructs were transformed  
550 by electroporation in *Agrobacterium tumefaciens* and *Arabidopsis* plants of accession  
551 Col-0 and *fd-2* were transformed by the floral dip method. Basta treatment (0.1% v/v)  
552 was used for screening for transgenic lines.

553

### 554 **ChIP and ChIP-seq**

555 Approximately 1.5 grams of seedlings (*pSUC2::GFP:FD*; *pSUC2::GFP:NLS*) or 300  
556 mg of manually dissected apices (*pFD::GFP:FD*; *Col-0*) from 16 days old plants  
557 grown on soil under long day 23°C were harvested and fixed in 1% formaldehyde under  
558 vacuum for 1 hour. ChIP was performed as previously described (Kaufmann et al.,  
559 2010) with the following minor changes: sonication was performed using a Covaris  
560 E220 system (conditions: intensity 200 W, duty 20, cycles 200, time 120 seconds),  
561 incubation time with antibody was increased to over-night, incubation time with  
562 protein-A agarose beads was increased to 4 hours, purification of DNA after de-cross  
563 linking was performed with MinElute Reaction Cleanup Kit (Qiagen).

564 Anti-GFP from AbCam (ab290) was used for immuno-precipitation. ChIP-seq libraries  
565 were prepared using TruSeq ChIP Library Preparation Kit (Illumina) and BluePippin  
566 was used for gel size selection of fragments between 200 bp and 500 bp. Final  
567 concentration and size distribution of the libraries were tested with Qubit and  
568 BioAnalyzer (Agilent High Sensitivity DNA Kit). Libraries were sequenced on an

569 Illumina HiSeq3000 system using the 50bp single end kit. All data are available from  
570 the accession number PRJEB24874.

571

### 572 **RNA extraction, RNA-seq and expression analysis**

573 For RNA-seq, Col-0 and *fd-2* plants were grown for 21 days under short day 23°C and  
574 then shifted to long day 23°C. RNA was extracted from manually dissected apices  
575 collected the day of the shift (T0) and 1, 2, 3, 5 days after shifting (T1, T2, T3 and T5  
576 respectively) using the RNeasy Plant Kit (Qiagen) according to manufactures  
577 instructions. RNA integrity and quantification were determined on a BioAnalyzer  
578 system. 1 µg of RNA was used to prepare libraries using the TruSeq RNA Library  
579 Prep Kit (Illumina). All libraries were quality controlled and quantified by Qubit and  
580 Bioanalyzer and run on a Illumina HiSeq3000 with 50bp single end kit. All RNA-seq  
581 data have been deposited at the accession number PRJEB24873.

582 Validation of the selected FD targets was performed in 7 days old seedlings grown on  
583 soil under long day at 23°C.

584 RNA was extracted using the RNeasy Plant Kit (Qiagen) according to manufactures  
585 instructions. cDNA was synthesized using the RevertAid RT Reverse Transcription Kit  
586 (ThermoScientific) according to the manufacture instructions. qRT-PCRs were  
587 performed on a CFX96 Touch Real-time PCR Detection System (BioRad) using  
588 LightCycler 480 SYBR Green I Master (Roche). Oligonucleotides used as primers for  
589 qRT-PCR are listed in table S3.

590

### 591 **ChIP-seq and RNA-seq analysis**

592 Raw data from ChIP-seq were trimmed of the adapters and aligned to the *A. thaliana*  
593 genome (TAIR10 release) using bwa (Li and Durbin, 2010). MACS2 was used to call  
594 peaks using default parameters (Zhang et al., 2008). Mapped reads from samples  
595 expressing GFP:NLS under the same promoter of the GFP:FD (e.g.: *pSUC2*) in  
596 seedlings experiments or Col-0 without any vector in apices experiments were used for  
597 normalization. Differential bound analyses were carried out using the R package  
598 “DiffBind” using default parameters (Ross-Innes et al., 2012; Stark, 2011).

599 For the analysis of RNA-seq data, sequencing reads mapping to rRNAs were filtered  
600 out using Sortmerna (Kopylova et al., 2012) and the remaining reads were trimmed of  
601 the adapter using Trimmomatic (Bolger et al., 2014). Alignment to the *A. thaliana*  
602 genome was performed with STAR (Dobin et al., 2013) and reads count with

603 HTSeqCount (Anders et al., 2015). Differential expression analysis was performed  
604 using DESeq2 with default parameters (Love et al., 2014).

605

### 606 **Electrophoretic Mobility Shift Assay (EMSA)**

607 Coding sequences of both the wild-type version as well as the phosphomimic variant  
608 (T282) of *FD* and its C-terminal domain (*FD-C*, amino acids: 203-285), *14-3-3v*  
609 (*At3g02520*; *GRF7*), *FT*, and *TFL1* were amplified by PCR to generate N-terminal 6X-  
610 His-tag CDS which were cloned into pETM-11 expression vector by restriction. All  
611 plasmids were transformed into *Escherichia coli* strain Rosetta plysS and proteins were  
612 induced with 1mM IPTG at 37°C over-night. Cell lysis was performed by sonication  
613 and proteins were purified using His60 columns (Clontech) and eluted in 50 mM of  
614 sodium phosphate buffer pH 8.0, 300 mM NaCl, 300 mM Imidazole. EMSA was  
615 performed using 5'-Cy3-labeled, double-stranded oligos of 30 bp covering the G-box  
616 contained in the *SEP3* promoter as a probe (Eurofins). For probe synthesis, single strand  
617 oligos were annealed in annealing buffer (10 mM Tris pH 8.0, 50 mM NaCl, 1 mM  
618 EDTA pH 8.0). Binding reactions were carried out in buffer containing 10 mM Tris pH  
619 8.0, 50 mM NaCl, 10  $\mu$ M ZnSO<sub>4</sub>, 50 mM KCl, 2.5% glycerol, 0.05% NP-40 in a total  
620 volume of 20  $\mu$ l. The binding reaction was kept in dark at room temperature for 20  
621 minutes and then loaded in native 8% polyacrylamide gel and run in 0.5X TBE at 4°C  
622 in dark. Results were visualized using a Typhoon imaging system.

623

624

625

626 **AUTHOR CONTRIBUTIONS**

627 S.C., L.Y., and M.S. designed the experiments. L.Y. established some of the FD:GFP  
628 reporter lines and performed initial ChIP (-seq) and flowering time analyses. M.N.  
629 cloned phosphomic and non-phosphorable versions of FD and analyzed their effect on  
630 flowering time. S.C. performed the EMSA studies, flowering times analysis and carried  
631 out and analyzed the ChIP-seq and RNA-seq experiments. S.C. and M.S. wrote the  
632 manuscript with input from all authors.

633

634

635 **ACKNOWLEDGEMENTS**

636 We thank Diana Saez for help in isolating homozygous *myc2* and *af1* mutants, the  
637 Protein Expertise Platform (PEP) at the Chemical Biological Center (KBC) at Umeå  
638 University for help with protein purification, and Nicolas Delhomme from the UPSC  
639 Bioinformatics Facility for assistance with submission of sequencing data. We  
640 acknowledge funding to the UPSC through grants from VINNOVA and The Knut and  
641 Alice Wallenberg Foundation. S.C. was supported through a Humboldt Foundation  
642 long-term postdoctoral fellowship. L.Y. acknowledges funding from the European  
643 Research Council (ERC) under the European Union's Horizon 2020 research and  
644 innovation programme (grant agreement 679056) and the UK Biological and  
645 Biotechnology Research Council (BBSRC) via grant BB/P013511/1 to the John Innes  
646 Centre. Supported through the Sonderforschungsbereich 1101 (Collaborative Research  
647 Centre 1101), project grant SFB1101/1-B04, and a research project grant from the Knut  
648 and Alice Wallenberg Foundation (2016.0025) to M.S.

649

## 650 REFERENCES

- 651 Abe, M., Kobayashi, Y., Yamamoto, S., Daimon, Y., Yamaguchi, A., Ikeda, Y.,  
652 Ichiniki, H., Notaguchi, M., Goto, K., and Araki, T. (2005). FD, a bZIP  
653 protein mediating signals from the floral pathway integrator FT at the shoot  
654 apex. *Science* 309:1052-1056.
- 655 Ahn, J.H., Miller, D., Winter, V.J., Banfield, M.J., Lee, J.H., Yoo, S.J., Henz, S.R.,  
656 Brady, R.L., and Weigel, D. (2006). A divergent external loop confers  
657 antagonistic activity on floral regulators FT and TFL1. *The EMBO Journal*  
658 25:605-614.
- 659 An, H., Roussot, C., Suarez-Lopez, P., Corbesier, L., Vincent, C., Pineiro, M.,  
660 Hepworth, S., Mouradov, A., Justin, S., Turnbull, C., et al. (2004).  
661 CONSTANS acts in the phloem to regulate a systemic signal that induces  
662 photoperiodic flowering of Arabidopsis. *Development* 131:3615-3626.
- 663 Anders, S., Pyl, P.T., and Huber, W. (2015). HTSeq--a Python framework to work  
664 with high-throughput sequencing data. *Bioinformatics* 31:166-169.
- 665 Benlloch, R., Kim, M.C., Sayou, C., Thevenon, E., Parcy, F., and Nilsson, O. (2011).  
666 Integrating long-day flowering signals: a LEAFY binding site is essential for  
667 proper photoperiodic activation of APETALA1. *The Plant Journal* 67:1094-  
668 1102.
- 669 Bolger, A.M., Lohse, M., and Usadel, B. (2014). Trimmomatic: a flexible trimmer for  
670 Illumina sequence data. *Bioinformatics* 30:2114-2120.
- 671 Causier, B., Ashworth, M., Guo, W., and Davies, B. (2012). The TOPLESS  
672 interactome: a framework for gene repression in Arabidopsis. *Plant*  
673 *Physiology* 158:423-438.
- 674 Corbesier, L., Vincent, C., Jang, S., Fornara, F., Fan, Q., Searle, I., Giakountis, A.,  
675 Farrona, S., Gissot, L., Turnbull, C., et al. (2007). FT Protein Movement  
676 Contributes to Long-Distance Signaling in Floral Induction of Arabidopsis.  
677 *Science* 316:1030-1033.
- 678 Deeken R., Ache P., Kajahn I., Klinkenberg J., Bringmann G., and R., H. (2008).  
679 Identification of Arabidopsis thaliana phloem RNAs provides a search  
680 criterion for phloem-based transcripts hidden in complex datasets of  
681 microarray experiments. *The Plant Journal* 55:746-759.
- 682 Dobin, A., Davis, C.A., Schlesinger, F., Drenkow, J., Zaleski, C., Jha, S., Batut, P.,  
683 Chaisson, M., and Gingeras, T.R. (2013). STAR: ultrafast universal RNA-seq  
684 aligner. *Bioinformatics* 29:15-21.
- 685 Gangappa, S.N., and Chattopadhyay, S. (2010). MYC2, a bHLH transcription factor,  
686 modulates the adult phenotype of SPA1. *Plant signaling & behavior* 5:1650-  
687 1652.
- 688 Gu, X., Wang, Y., and He, Y. (2013). Photoperiodic regulation of flowering time  
689 through periodic histone deacetylation of the florigen gene FT. *PLoS biology*  
690 11:e1001649.
- 691 Hanano, S., and Goto, K. (2011). Arabidopsis TERMINAL FLOWER1 is involved in  
692 the regulation of flowering time and inflorescence development through  
693 transcriptional repression. *The Plant Cell* 23:3172-3184.
- 694 Hanzawa, Y., Money, T., and Bradley, D. (2005). A single amino acid converts a  
695 repressor to an activator of flowering. *PNAS* 102:7748-7753.

- 696 Ho, W.W., and Weigel, D. (2014). Structural Features Determining Flower-  
697 Promoting Activity of Arabidopsis FLOWERING LOCUS T. *The Plant Cell*  
698 26: 552-564.
- 699 Huang, N.C., Jane, W.N., Chen, J., and Yu, T.S. (2012). Arabidopsis thaliana  
700 CENTRORADIALIS homologue (ATC) acts systemically to inhibit floral  
701 initiation in Arabidopsis. *The Plant Journal* 72:175-184.
- 702 Hwan Lee, J., Joon Kim, J., and Ahn, J.H. (2012). Role of SEPALLATA3 (SEP3) as  
703 a downstream gene of miR156-SPL3-FT circuitry in ambient temperature-  
704 responsive flowering. *Plant signaling & behavior* 7:1151-1154.
- 705 Jakoby, M., Weisshaar, B., Dröge-laser, W., Vicente-Carbajosa, J., Tiedemann, J.,  
706 Kroj, T., and Parcy, F. (2002). bZIP transcription factors in Arabidopsis.  
707 *TRENDS in Plant Science* 7:106-111.
- 708 Jung, J.H., Ju, Y., Seo, P.J., Lee, J.H., and Park, C.M. (2012). The SOC1-SPL module  
709 integrates photoperiod and gibberellic acid signals to control flowering time in  
710 Arabidopsis. *The Plant Journal* 69:577-588.
- 711 Kaneko-Suzuki, M., Kurihara-Ishikawa, R., Okushita-Terakawa, C., Kojima, C.,  
712 Nagano-Fujiwara, M., Ohki, I., Tsuji, H., Shimamoto, K., and Taoka, K.  
713 (2018). TFL1-Like Proteins in Rice Antagonize Rice FT-Like Protein in  
714 Inflorescence Development by Competition for Complex Formation with 14-  
715 3-3 and FD. *Plant & cell physiology* 59:458-468.
- 716 Kaufmann, K., Muino, J.M., Osteras, M., Farinelli, L., Krajewski, P., and Angenent,  
717 G.C. (2010). Chromatin immunoprecipitation (ChIP) of plant transcription  
718 factors followed by sequencing (ChIP-SEQ) or hybridization to whole genome  
719 arrays (ChIP-CHIP). *Nature protocols* 5:457-472.
- 720 Kawamoto, N., Sasabe, M., Endo, M., Machida, Y., and Araki, T. (2015). Calcium-  
721 dependent protein kinases responsible for the phosphorylation of a bZIP  
722 transcription factor FD crucial for the florigen complex formation. *Scientific*  
723 *reports* 5:8341.
- 724 Koornneef, M., C.J. Hanhart, C.J., and van der Veen, J.H. (1991). A genetic and  
725 physiological analysis of late flowering mutants in Arabidopsis thaliana. *Mol*  
726 *Gen Genet* 229:57-66.
- 727 Kopylova, E., Noe, L., and Touzet, H. (2012). SortMeRNA: fast and accurate filtering  
728 of ribosomal RNAs in metatranscriptomic data. *Bioinformatics* 28:3211-3217.
- 729 Lee, J., and Lee, I. (2010). Regulation and function of SOC1, a flowering pathway  
730 integrator. *Journal of experimental botany* 61:2247-2254.
- 731 Li, H., and Durbin, R. (2010). Fast and accurate long-read alignment with Burrows-  
732 Wheeler transform. *Bioinformatics* 26:589-595.
- 733 Love, M.I., Huber, W., and Anders, S. (2014). Moderated estimation of fold change  
734 and dispersion for RNA-seq data with DESeq2. *Genome biology* 15:550.
- 735 Machanick, P., and Bailey, T.L. (2011). MEME-CHIP: motif analysis of large DNA  
736 datasets. *Bioinformatics* 27:1696-1697.
- 737 Major, I.T., Yoshida, Y., Campos, M.L., Kapali, G., Xin, X.F., Sugimoto, K., de  
738 Oliveira Ferreira, D., He, S.Y., and Howe, G.A. (2017). Regulation of growth-  
739 defense balance by the JASMONATE ZIM-DOMAIN (JAZ)-MYC  
740 transcriptional module. *The New Phytologist* 215:1533-1547.

- 741 Mathieu, J., Warthmann, N., Kuttner, F., and Schmid, M. (2007). Export of FT  
742 protein from phloem companion cells is sufficient for floral induction in  
743 Arabidopsis. *Current Biology* 17:1055-1060.
- 744 Moon, J., Lee, H., Kim, M., and Lee, I. (2005). Analysis of flowering pathway  
745 integrators in Arabidopsis. *Plant & cell physiology* 46:292-299.
- 746 Moon, J., Suh, S.-S., Lee, H., Choi, K.-R., Hong, C.B., Paek, N.-C., Kim, S.-G., and  
747 Lee, I. (2003). The SOC1MADS-box gene integrates vernalization and  
748 gibberellin signals for flowering in Arabidopsis. *The Plant Journal* 35:613-623.
- 749 Pauwels, L., Barbero, G.F., Geerinck, J., Tilleman, S., Grunewald, W., Perez, A.C.,  
750 Chico, J.M., Bossche, R.V., Sewell, J., Gil, E., et al. (2010). NINJA connects  
751 the co-repressor TOPLESS to jasmonate signalling. *Nature* 464:788-791.
- 752 Romera-Branchat, M., Andres, F., and Coupland, G. (2014). Flowering responses to  
753 seasonal cues: what's new? *Current opinion in plant biology* 21:120-127.
- 754 Ross-Innes, C.S., Stark, R., Teschendorff, A.E., Holmes, K.A., Ali, H.R., Dunning,  
755 M.J., Brown, G.D., Gojts, O., Ellis, I.O., Green, A.R., et al. (2012).  
756 Differential oestrogen receptor binding is associated with clinical outcome in  
757 breast cancer. *Nature* 481:389-393.
- 758 Ryu, J.Y., Lee, H.J., Seo, P.J., Jung, J.H., Ahn, J.H., and Park, C.M. (2014). The  
759 Arabidopsis floral repressor BFT delays flowering by competing with FT for  
760 FD binding under high salinity. *Molecular Plant* 7:377-387.
- 761 Schmid, M., Davison, T.S., Henz, S.R., Pape, U.J., Demar, M., Vingron, M.,  
762 Scholkopf, B., Weigel, D., and Lohmann, J.U. (2005). A gene expression map  
763 of Arabidopsis thaliana development. *Nature genetics* 37:501-506.
- 764 Song, Y.H., Lee, I., Lee, S.Y., Imaizumi, T., and Hong, J.C. (2012). CONSTANS and  
765 ASYMMETRIC LEAVES 1 complex is involved in the induction of  
766 FLOWERING LOCUS T in photoperiodic flowering in Arabidopsis. *The*  
767 *Plant Journal* 69:332-342.
- 768 Song, Y.H., Shim, J.S., Kinmonth-Schultz, H.A., and Imaizumi, T. (2015).  
769 Photoperiodic flowering: time measurement mechanisms in leaves. *Annual*  
770 *review of plant biology* 66:441-464.
- 771 Srikanth, A., and Schmid, M. (2011). Regulation of flowering time: all roads lead to  
772 Rome. *Cellular and molecular life sciences* 68:2013-2037.
- 773 Stark, R.B.G. (2011). DiffBind: differential binding analysis of ChIP-Seq peak data.  
774 [http://bioconductor.org/packages/release/bioc/vignettes/DiffBind/inst/doc/Diff](http://bioconductor.org/packages/release/bioc/vignettes/DiffBind/inst/doc/DiffBind.pdf)  
775 [Bind.pdf](http://bioconductor.org/packages/release/bioc/vignettes/DiffBind/inst/doc/DiffBind.pdf).
- 776 Taoka, K., Ohki, I., Tsuji, H., Furuita, K., Hayashi, K., Yanase, T., Yamaguchi, M.,  
777 Nakashima, C., Purwestri, Y.A., Tamaki, S., et al. (2011). 14-3-3 proteins act  
778 as intracellular receptors for rice Hd3a florigen. *Nature* 476:332-335.
- 779 Teper-Bamnolker, P., and Samach, A. (2005). The flowering integrator FT regulates  
780 SEPALLATA3 and FRUITFULL accumulation in Arabidopsis leaves. *The*  
781 *Plant Cell* 17:2661-2675.
- 782 Theissen, G., Melzer, R., and Rumpler, F. (2016). MADS-domain transcription  
783 factors and the floral quartet model of flower development: linking plant  
784 development and evolution. *Development* 143:3259-3271.



- 785 Wang, H., Li, Y., Pan, J., Lou, D., Hu, Y., and Yu, D. (2017). The bHLH  
786 Transcription Factors MYC2, MYC3, and MYC4 Are Required for  
787 Jasmonate-Mediated Inhibition of Flowering in Arabidopsis. *Molecular Plant*  
788 10:1461-1464.
- 789 Wang, J.W., Czech, B., and Weigel, D. (2009). miR156-regulated SPL transcription  
790 factors define an endogenous flowering pathway in Arabidopsis thaliana. *Cell*  
791 138:738-749.
- 792 Wigge, P.A., Chul Kim, M., Jaeger, K.E., Busch, W., Schmid, M., Lohmann, J.U.,  
793 and Weigel, D. (2005). Integration of spatial and temporal information during  
794 floral induction in Arabidopsis. *Science* 309:1056-1059.
- 795 Yamaguchi, A., Kobayashi, Y., Goto, K., Abe, M., and Araki, T. (2005). TWIN  
796 SISTER OF FT (TSF) acts as a floral pathway integrator redundantly with FT.  
797 *Plant & cell physiology* 46:1175-1189.
- 798 Yoo, S.K., Chung, K.S., Kim, J., Lee, J.H., Hong, S.M., Yoo, S.J., Yoo, S.Y., Lee,  
799 J.S., and Ahn, J.H. (2005). CONSTANS activates SUPPRESSOR OF  
800 OVEREXPRESSION OF CONSTANS 1 through FLOWERING LOCUS T to  
801 promote flowering in Arabidopsis. *Plant Physiology* 139:770-778.
- 802 Zhai, Q., Zhang, X., Wu, F., Feng, H., Deng, L., Xu, L., Zhang, M., Wang, Q., and Li,  
803 C. (2015). Transcriptional Mechanism of Jasmonate Receptor COI1-Mediated  
804 Delay of Flowering Time in Arabidopsis. *The Plant Cell* 27:2814-2828.
- 805 Zhang, Y., Liu, T., Meyer, C.A., Eeckhoute, J., Johnson, D.S., Bernstein, B.E.,  
806 Nusbaum, C., Myers, R.M., Brown, M., Li, W., et al. (2008). Model-based  
807 analysis of ChIP-Seq (MACS). *Genome biology* 9:R137.
- 808

809 **FIGURE LEGENDS**

810

811 **Figure 1.** Identification of FD targets by *pSUC2::GFP:FD* ChIP-seq in WT and *ft-10*  
812 *tsf-1* and *pFD::GFP:FD* ChIPseq in *fd-2*.

813 (A) Annotation of high-confidence peaks found in two biological replicates in WT  
814 and *ft-10 tsf-1*.

815 (B) 4-set venn diagram representing the overlapping peaks among all the biological  
816 replicates from WT and *ft-10 tsf-1*. The majority of peaks (1514) is shared  
817 between the two genetic backgrounds.

818 (C) Nucleotide logo of the predicted FD binding site.

819 (D) Binding matrix (affinity scores) based on ChIP-seq reads counts for WT and *ft-*  
820 *10 tsf-1* samples. The presence of FT and TSF is sufficient to discriminate the  
821 two genetic backgrounds.

822 (E) Differential bound (DB) peaks between WT and *ft-10 tsf-1*. Red dots indicate  
823 differentially bound peaks with a FDR < 0.05.

824 (F) Reads from WT, *ft-10 tsf-1* and control sample mapped against selected  
825 flowering related genes.

826 (G) Annotation of high-confidence peaks identified by ChIPseq in two biological  
827 replicates in *pFD::GFP:FD fd-2*.

828 (H) Nucleotide logo of the predicted FD binding site at the SAM.

829

830

831 **Figure 2.** The C-terminal part of FD (FD-C) binds to a G-box in the *SEP3* promoter in  
832 vitro.

833 (A) Electrophoretic mobility shift assay (EMSA) of the wild-type form of FD-C in  
834 combination with 14-3-3v, FT, and TFL1. FD-C weakly binds the probe on its  
835 own but it is not able to form complex with 14-3-3v and FT. However, FD-C  
836 forms a complex with 14-3-3v and TFL1 capable of binding the G-box.

837 (B) Phosphomimic version of FD-C (FD-C\_T282E) in combinations with 14-3-3v,  
838 FT and TFL1. The phosphomimic version of FD-C binds the G-box alone and  
839 it is interacting with 14-3-3v, which facilitates interaction with FT and TFL1.  
840 Both, wild-type and phosphomimic version of FD-C, require 14-3-3v for  
841 interaction with FT or TFL1.

842 Asterisk (\*) indicate shifted probe.

843

844 **Figure 3.** Phosphorylation of FD at threonine 282 (T282) modulates flowering time in  
845 *A. thaliana*.

846 Expression of wildtype (WT) *pFD::FD* rescues the late flowering phenotype of  
847 *fd-2*. Mutation of T282 to alanine (T>A) in *pFD::FD\_T282A*, which prevents  
848 phosphorylation, abolishes rescue of *fd-2*. Mutations mimicking constitutive  
849 phosphorylation of T282 (T>E), S281 (S>E), or both (ST>EE) induce early  
850 flowering. Results are shown for two independent homozygous lines per  
851 construct. Statistical significance was calculated using unpaired t-test  
852 compared to Col-0. \*\*\* indicate a significance level  $p < 0.01$ .

853

854

855 **Figure 4.** Mapping of the FD binding site in the *API* promoter.

856 (A) Normalized reads from six ChIP-seq experiments mapped on the *API* locus. The  
857 result shows that the C-box is laying upstream of all peak summits.

858 (B) Nucleotide sequence encompassing the six peak summits shows several  
859 palindromic regions representing putative binding sites of *FD* on *API* promoter.  
860 The distance between the closest potential FD binding site under the ChIP-seq  
861 peaks and the C-box is 92 bp . Black triangles indicate the summits of the six  
862 separate ChIP-seq experiments. Putative FD binding sites are underlined and  
863 numbered from 1 to 4.

864 (C) Electrophoretic mobility shift assay (EMSA) of the phosphomimic version of  
865 FD-C (FD-C\_T282E) in combinations with 14-3-3v, FT and TFL1 using the  
866 four putative binding sites reported in panel B. Free probes are not visible  
867 because gels were running longer to maximize the distance between shifted  
868 probes. Coloured squares indicate shifted probes.

869 (D) Comparison of the probes used for EMSA: the G-box in *SEP3* promoter (Fig. 2)  
870 and the binding site 2 in *API* promoter. The putative FD binding site in *API*  
871 promoter is also conserved in *SEP3* promoter and it is overlapping with the G-  
872 box.

873

874

875 **Figure 5.** RNA-seq results at the shoot apical meristem.

876 (A) Scatter blot of differential expressed (DE) genes between the *fd-2* mutant and  
877 *pFD::GFP-FD fd-2* (control) at 5 time points before and during the transition  
878 to photoperiod-induced flowering. T0 – T5 indicate day of sample collection

879 before (T0) and 1, 2, 3, 5 days after shifting plants to long day. Red dots  
880 indicate DE genes with a  $p_{adj} < 0.1$ .  
881 **(B)** Venn diagrams showing the overlap between FD target genes identified by  
882 ChIP-seq and DE genes found by RNA-seq at the SAM at each time point.  
883 **(C)** Venn diagram showing the overlap between FD target unique genes identified  
884 by ChIP-seq and DE unique genes in at least one time point found by RNA-  
885 seq at the SAM. A total of 135 genes were classified as putative direct targets  
886 of FD. Statistical significance was calculated using the Fisher's exact test.  
887 Asterisk (\*) indicates a significance level  $p = 1.03E-07$ .

888

889

890 **Figure 6.** Validation of FD targets in Col-0 and *p35S::FD*.

891 qRT-PCR analysis of 12 putative direct targets of FD. RNA was isolate from 7  
892 days old seedlings to minimize any bias due to the early flowering of the  
893 *p35S::FD* line. Error bars represent  $\pm$ SD from three biological replicates.

894

895

896 **Figure 7.** Flowering time of *myc2* and *afr1*.

897 Flowering time of homozygous of *myc2* and *afr1* T-DNA insertion lines was  
898 scored as days to flowering (A) and total leaves (B). Statistical significance  
899 was calculated using unpaired t-test compared to Col-0. \*\*\* and \*\* indicate a  
900 significance level  $p < 0.01$  and  $p < 0.05$ , respectively.

901

902

903

904 **SUPPLEMENTAL MATERIALS**

905

906 **Supplemental figures**

907

908 **Figure S1.** ChIP-seq summary statistics for the different biological replicates:

909 *pSUC2::GFP:FD* in Col-0 (A, D, G, J) and *ft-10 tsf-1* mutant background (B,  
910 E, H, K), *pFD::GFP:FD* in *fd-2* mutant background (C, F, I, L).

911 **Figure S2.** Verification of comparability of controls used for normalization of FD  
912 (*pSUC2::GFP:FD*) ChIP-seq in WT and *ft-10 tsf-1* seedlings.

913 **Figure S3.** Effect of misexpression of FD on gene expression and flowering time.

914 **Figure S4.** Electrophoretic mobility shift assays (EMSAs) to test FD binding to the  
915 *SEP3* and *API* promoters.

916 **Figure S5.** Summary of RNA-seq results.

917 **Figure S6.** Expression profile of selected FD target genes.

918 **Figure S7.** Gene Ontology (GO) analysis on the subset of 135 direct genes of FD.

919

920

921 **Supplemental tables**

922

923 **Table S1.** List of mutants and oligos for genotyping used in the study.

924 **Table S2.** List of vectors used in the study.

925 **Table S3.** List of oligos used for qRT-PCR in the study.

926

927

928 **Supplemental Data Sets**

929

930 **Supplemental Data Set 1.** List of 1754 FD-bound peaks identified in seedlings  
931 expressing *pSUC2::GFP:FD* in Col-0.

932 **Supplemental Data Set 2.** List of 2427 FD-bound peaks identified in seedlings  
933 expressing *pSUC2::GFP:FD* in *ft-10 tsf-1*.

934 **Supplemental Data Set 3.** List of 1514 FD-bound peaks detected in seedlings  
935 expressing *pSUC2::GFP:FD* in either Col-0 or *ft-10 tsf-1*.

936 **Supplemental Data Set 4.** List of 917 peaks that were differential bound in  
937 seedlings expressing *pSUC2::GFP:FD* in either Col-0 or *ft-10 tsf-1*.

- 938 **Supplemental Data Set 5.** List of 595 shared FD-bound peaks in apices  
939 *pFD::GFP:FD fd-2* rescue line.
- 940 **Supplemental Data Set 6.** List of differentially expressed genes.
- 941 **Supplemental Data Set 7.** List of 135 potential direct targets of FD.
- 942 **Supplemental Data Set 8.** List of 27 genes related to "response to hormone"  
943 category within the subset of the 135 direct target of FD.  
944

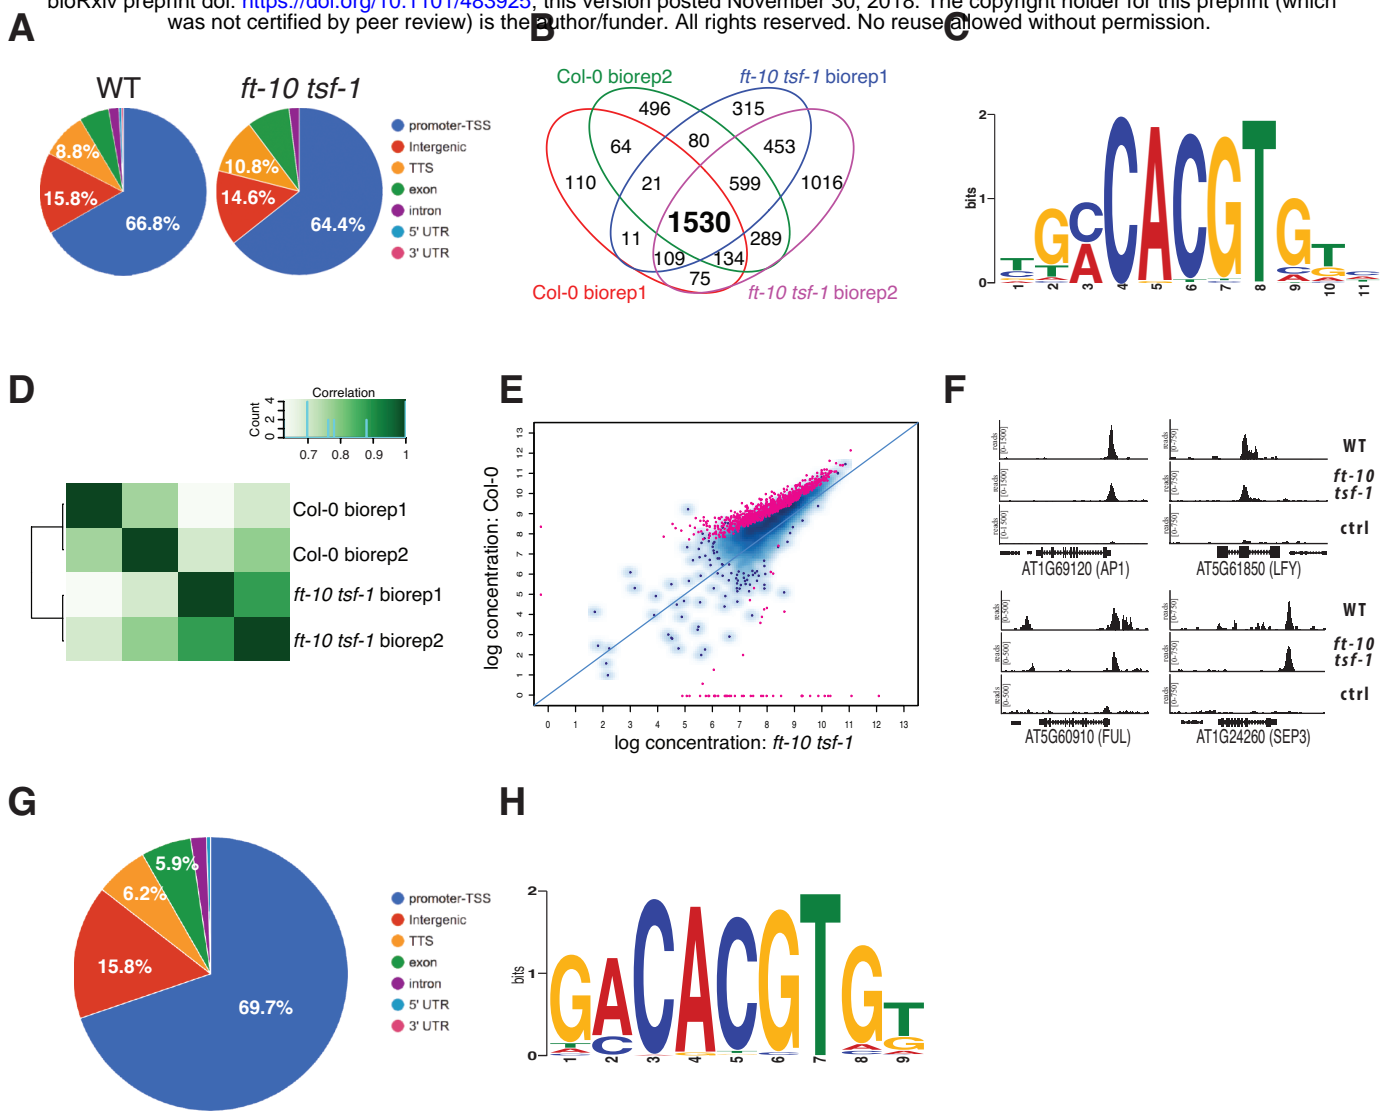

**Figure 1.** Identification of FD targets by *pSUC2::GFP:FD* ChIP-seq in WT and *ft-10 tsf-1* and *pFD::GFP:FD* ChIP-seq in *fd-2*.

- (A) Annotation of high-confidence peaks found in two biological replicates in WT and *ft-10 tsf-1*.
- (B) 4-set venn diagram representing the overlapping peaks among all the biological replicates from WT and *ft-10 tsf-1*. The majority of peaks (1530) is shared between the two genetic backgrounds.
- (C) Nucleotide logo of the predicted FD binding site.
- (D) Binding matrix (affinity scores) based on ChIP-seq reads counts for WT and *ft-10 tsf-1* samples. The presence of FT and TSF is sufficient to discriminate the two genetic backgrounds.
- (E) Differential bound (DB) peaks between WT and *ft-10 tsf-1*. Red dots indicate differentially bound peaks with a FDR < 0.05.
- (F) Reads from WT, *ft-10 tsf-1* and control sample mapped against selected flowering related genes.
- (G) Annotation of high-confidence peaks identified by ChIP-seq in two biological replicates in *pFD::GFP:FD fd-2*.
- (H) Nucleotide logo of the predicted FD binding site at the SAM.

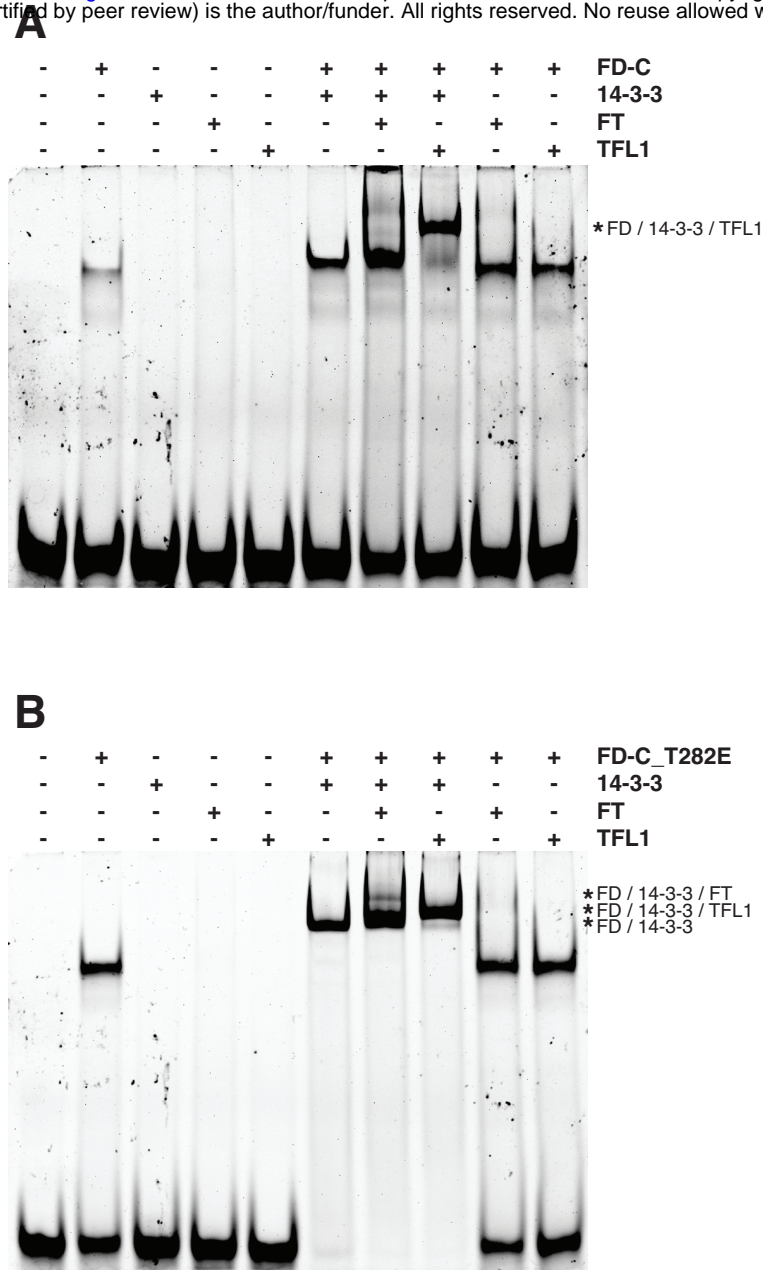

**Figure 2.** The C-terminal part of FD (FD-C) binds to a G-box in the SEP3 promoter *in vitro*.

- (A)** Electrophoretic mobility shift assay (EMSA) of the wild-type form of FD-C in combination with 14-3-3v, FT, and TFL1. FD-C weakly binds the probe on its own but it is not able to form complex with 14-3-3v and FT. However, FD-C forms a complex with 14-3-3v and TFL1 capable of binding the G-box.
- (B)** Phosphomimic version of FD-C (FD-C\_T282E) in combinations with 14-3-3v, FT and TFL1. The phosphomimic version of FD-C binds the G-box alone and it is interacting with 14-3-3v, which facilitates interaction with FT and TFL1. Both, wild-type and phosphomimic version of FD-C, require 14-3-3v for interaction with FT or TFL1. Asterisk (\*) indicate shifted probe.



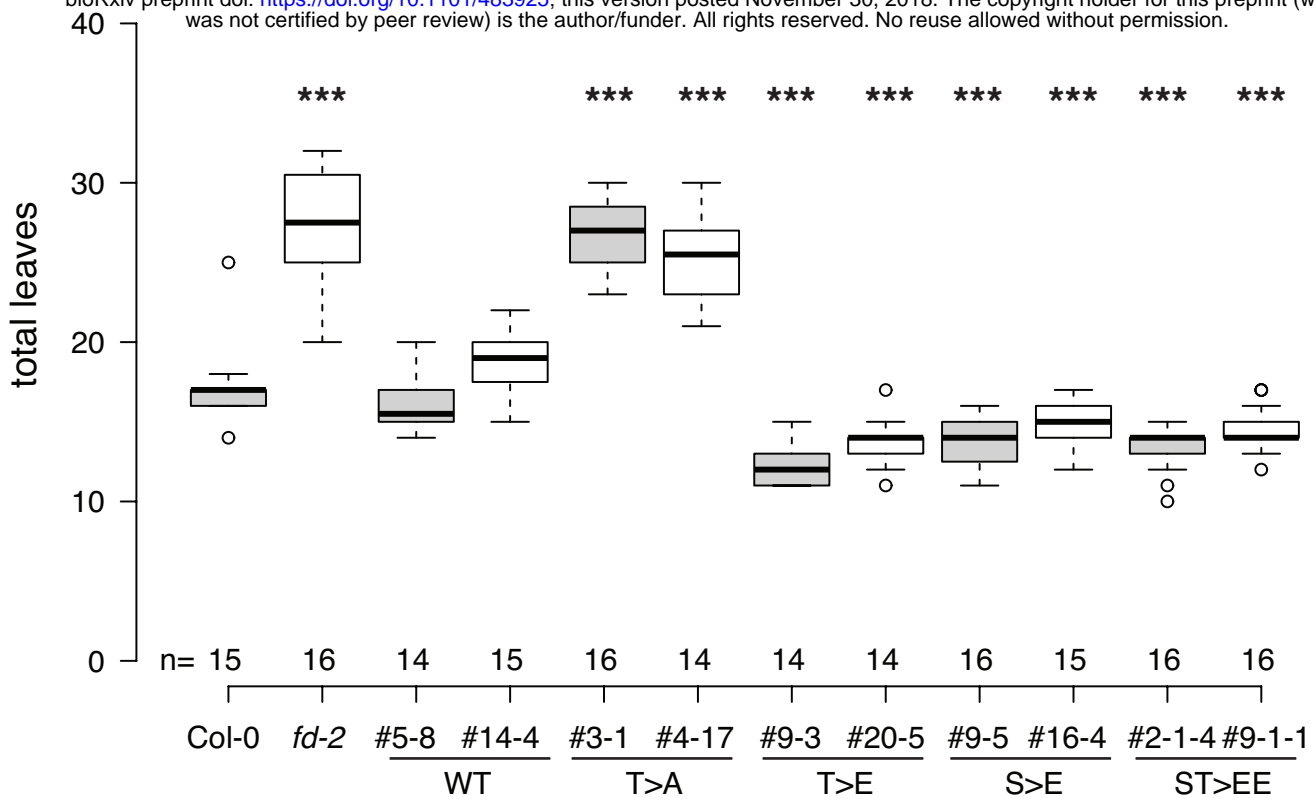

**Figure 3.** Phosphorylation of FD at threonine 282 (T282) modulates flowering time in *A. thaliana*. Expression of wildtype (WT) *pFD::FD* rescues the late flowering phenotype of *fd-2*. Mutation of T282 to alanine (T>A) in *pFD::FD\_T282A*, which prevents phosphorylation, abolishes rescue of *fd-2*. Mutations mimicking constitutive phosphorylation of T282 (T>E), S281 (S>E), or both (ST>EE) induce early flowering. Results are shown for two independent homozygous lines per construct. Statistical significance was calculated using unpaired t-test compared to Col-0. \*\*\* indicate a significance level  $p < 0.01$ .

**A**

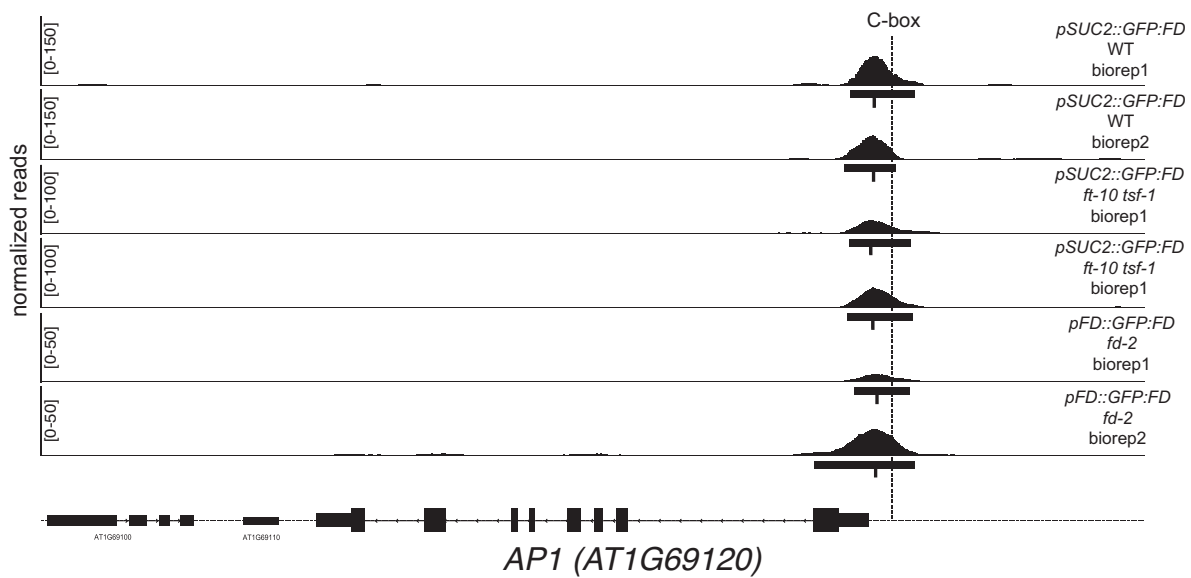

**B**

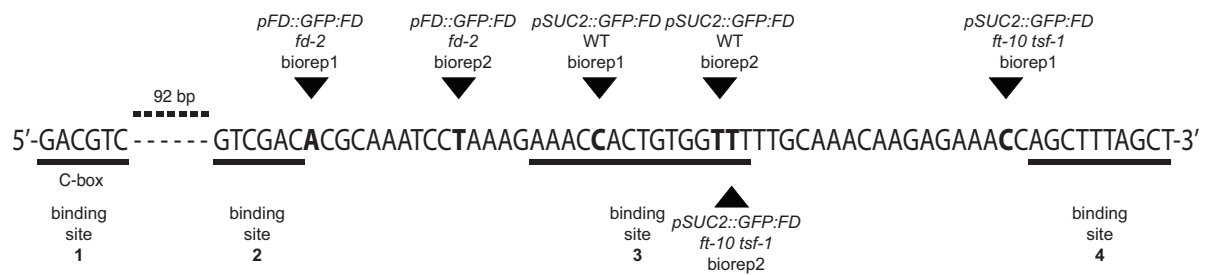

**C**

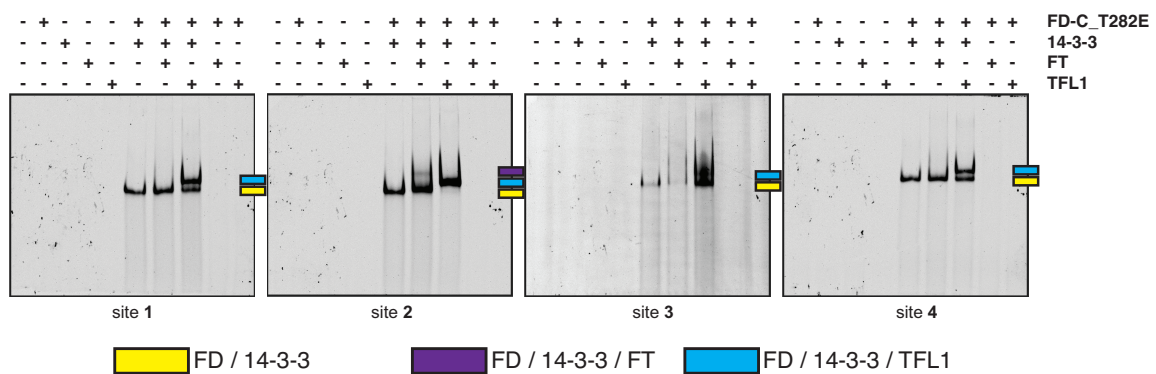

**D**

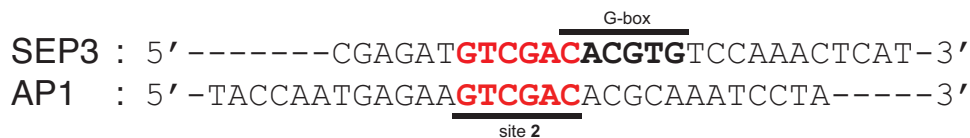

**Figure 4.** Mapping of the FD binding site in the AP1 promoter.

- (A) Normalized reads from six ChIP-seq experiments mapped on the *AP1* locus. The result shows that the C-box is laying upstream of all peak summits.
- (B) Nucleotide sequence encompassing the six peak summits shows several palindromic regions representing putative binding sites of FD on *AP1* promoter. The distance between the closest potential FD binding site under the ChIP-seq peaks and the C-box is 92 bp. Black triangles indicate the summits of the six separate ChIP-seq experiments. Putative FD binding sites are underlined and numbered from 1 to 4.
- (C) Electrophoretic mobility shift assay (EMSA) of the phosphomimic version of FD-C (FD-C\_T282E) in combinations with 14-3-3v, FT and TFL1 using the four putative binding sites reported in panel B. Free probes are not visible because gels were running longer to maximize the distance between shifted probes. Coloured squares indicate shifted probes.
- (D) Comparison of the probes used for EMSA: the G-box in *SEP3* promoter (Fig. 2) and the binding site 2 in *AP1* promoter. The putative FD binding site in *AP1* promoter is also conserved in *SEP3* promoter and it is overlapping with the G-box.

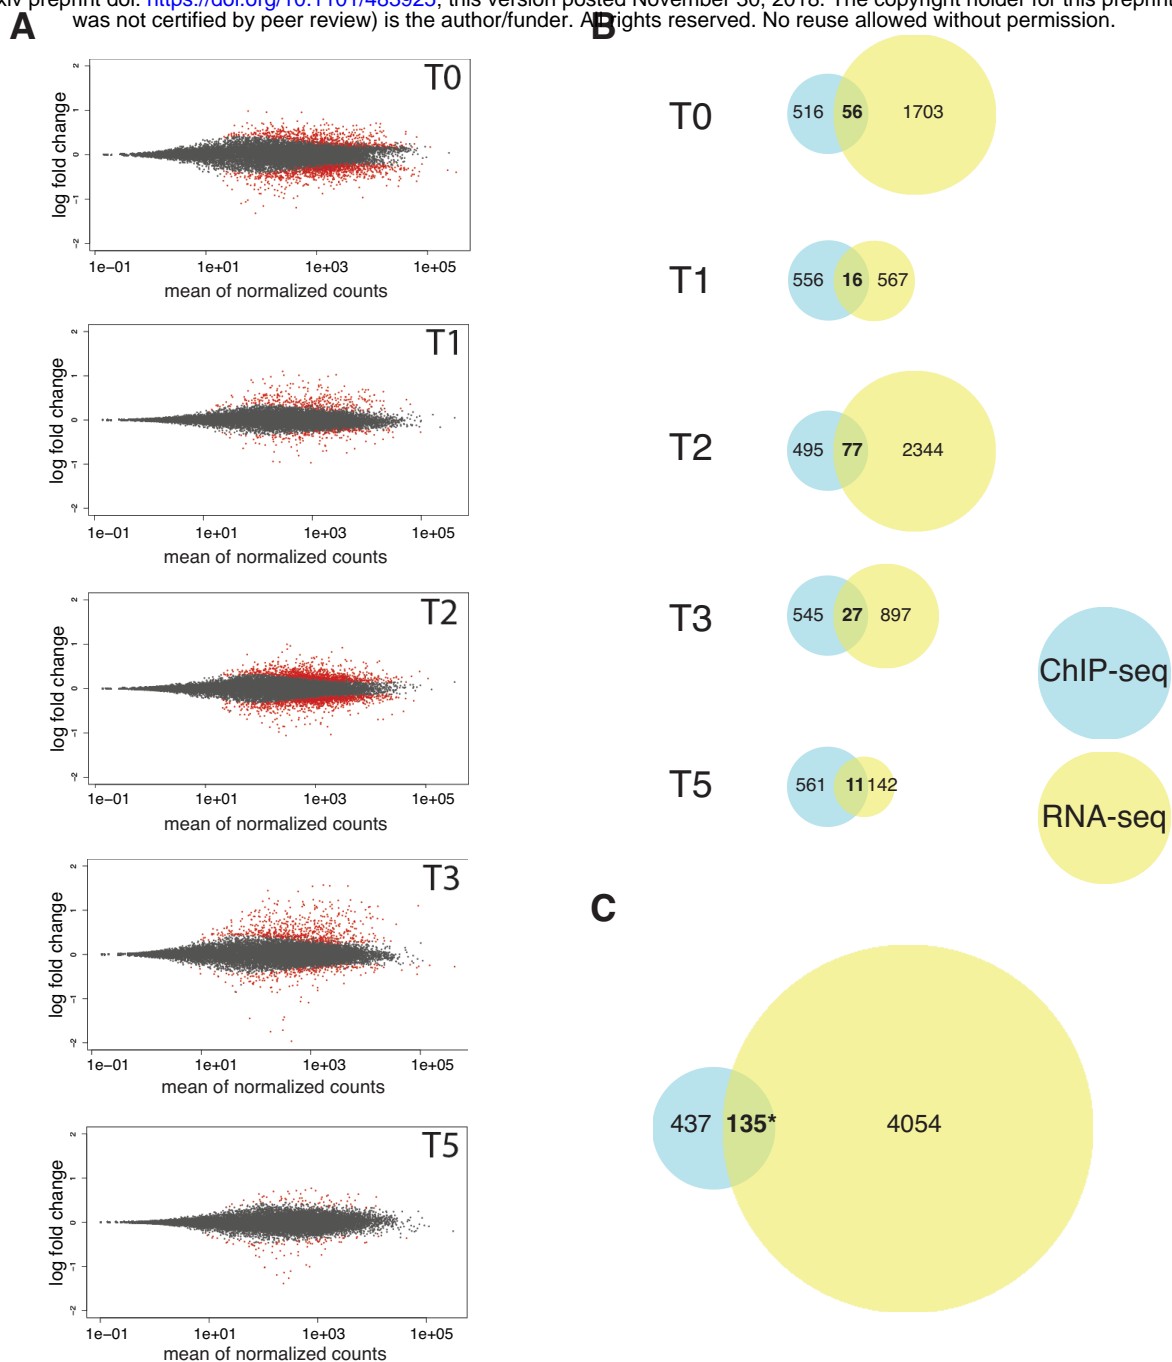

**Figure 5.** RNA-seq results at the shoot apical meristem.

- (A)** Scatter blot of differential expressed (DE) genes between the *fd-2* mutant and *pFD::GFP-FD fd-2* (control) at 5 time points before and during the transition to photoperiod-induced flowering. T0 – T5 indicate day of sample collection before (T0) and 1, 2, 3, 5 days after shifting plants to long day. Red dots indicate DE genes with a  $padj < 0.1$ .
- (B)** Venn diagrams showing the overlap between FD target genes identified by ChIP-seq and DE genes found by RNA-seq at the SAM at each time point.
- (C)** Venn diagram showing the overlap between FD target unique genes identified by ChIP-seq and DE unique genes in at least one time point found by RNA-seq at the SAM. A total of 135 genes were classified as putative direct targets of FD. Statistical significance was calculated using the Fisher's exact test. Asterisk (\*) indicates a significance level  $p = 1.03E-07$ .

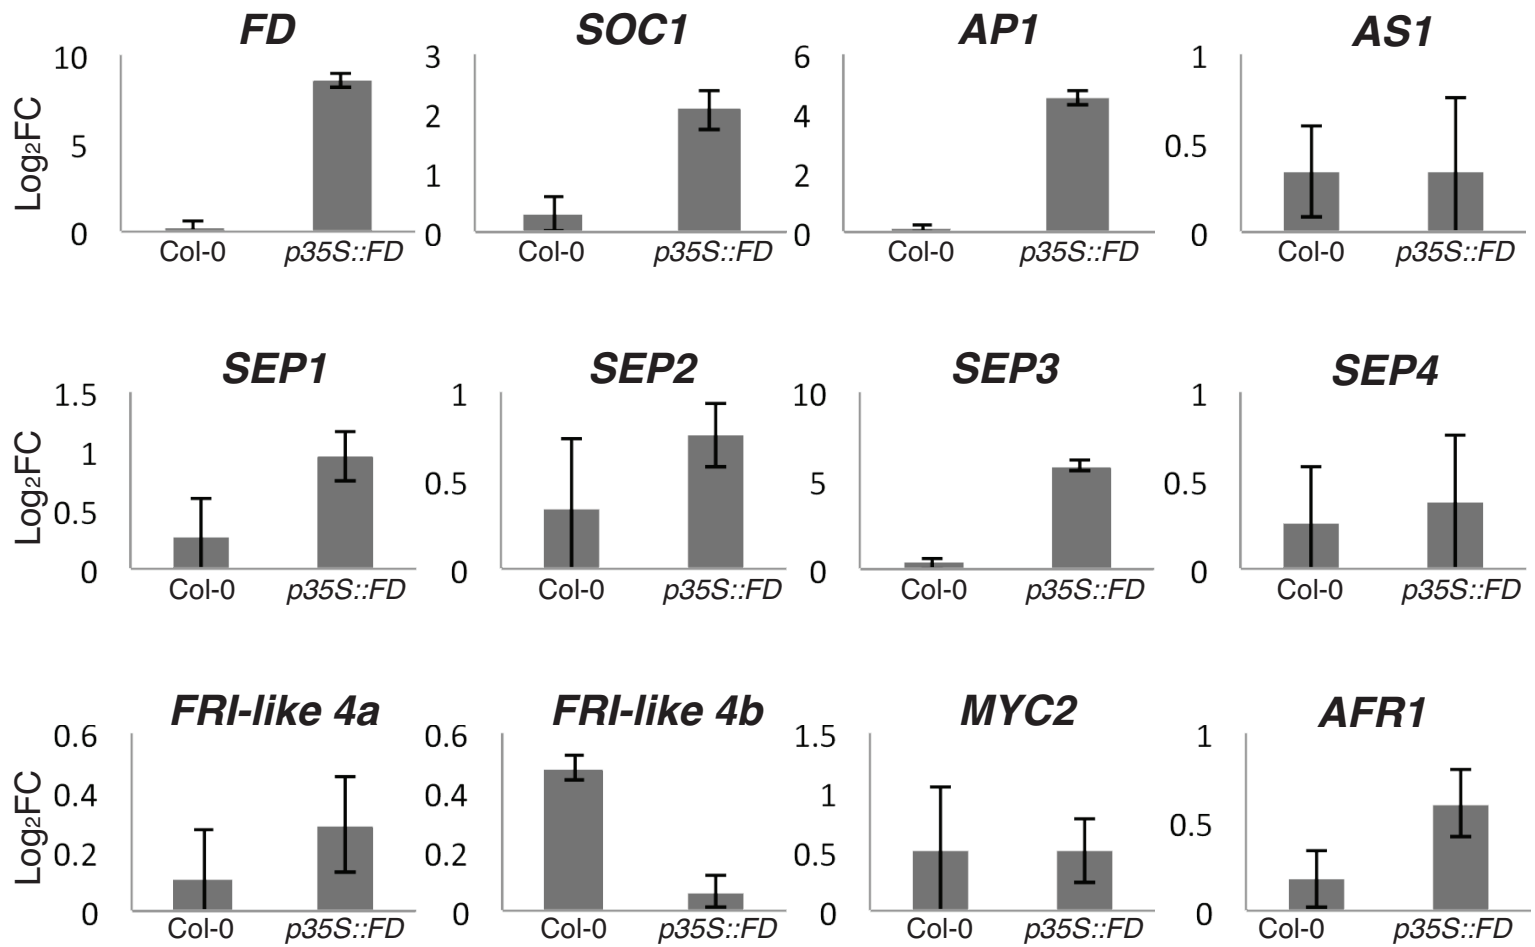

**Figure 6.** Validation of FD targets in Col-0 and p35S::FD.

qRT-PCR analysis of 12 putative direct targets of FD. RNA was isolate from 7 days old seedlings to minimize any bias due to the early flowering of the p35S::FD line. Error bars represent ±SD from three biological replicates.

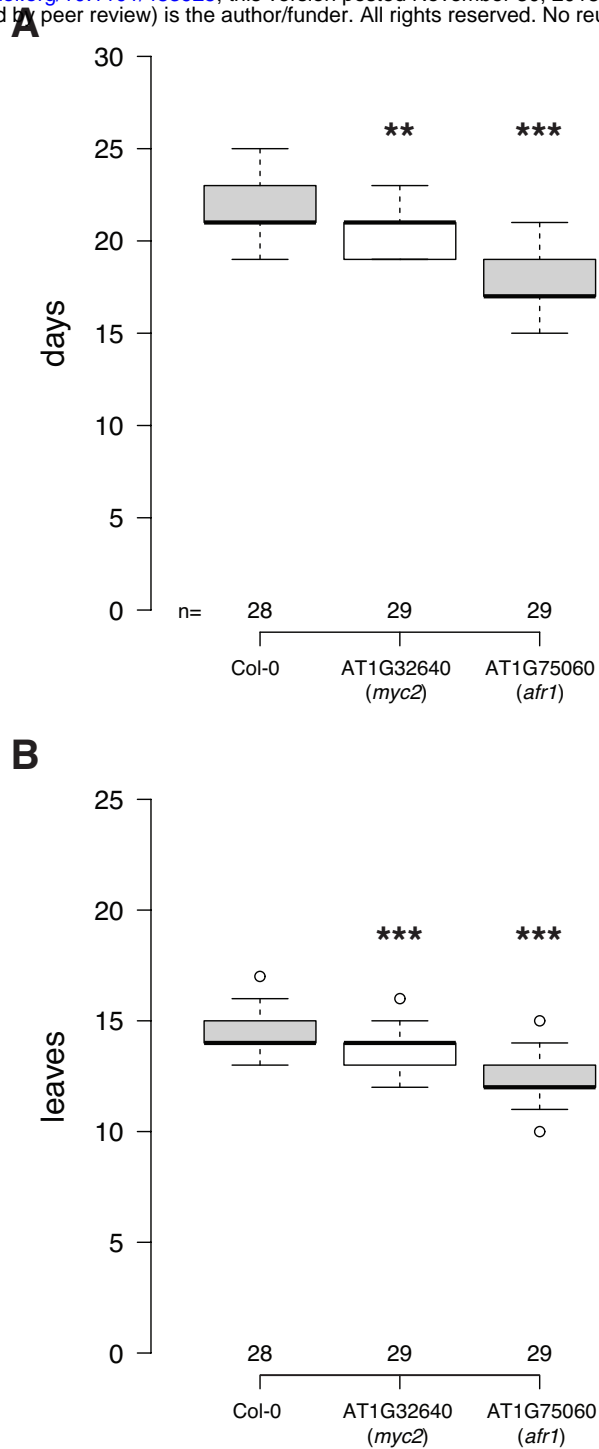

**Figure 7.** Flowering time of *myc2* and *afr1*. Flowering time of homozygous of *myc2* and *afr1* T-DNA insertion lines was scored as days to flowering (**A**) and total leaves (**B**). Statistical significance was calculated using unpaired t-test compared to Col-0. \*\*\* and \*\* indicate a significance level  $p < 0.01$  and  $p < 0.05$ , respectively.
